# Supplementary material for: Salicylaldoxime and salen containing imidazolium ionic liquids for biphasic catalysis and metal extractions
Source: Royal Society of Chemistry journal article supplement (doi:10.1039/b811232k), 2008-01-01
Supplement: b811232k.pdf [file b811232k.pdf]

**Electronic Supplementary Information**

**Preparation of 5-Chloromethyl-2-hydroxybenzaldehyde from salicylaldehyde**

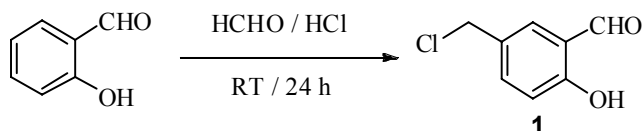

To a well stirred mixture of conc. hydrochloric acid (150 mL) and formaldehyde 37 wt % in H<sub>2</sub>O (10.8 mL) was added salicylaldehyde (15 mL, 141.39 mmol) and the reaction was stirred at room temperature for 24 h. The solid that separated out was filtered dissolved in diethyl ether and evaporated. Recrystallization from n-hexane afforded the product, 5-chloromethyl-2-hydroxybenzaldehyde (12.46 g) in 51.5% yield.

**Characterization data of compound 1:**

Yield: 51.5%. IR (KBr): 3242, 3196, 2875, 2361, 1656, 1578, 1482, 1437, 1379, 1318, 1282, 1246, 1189, 1147, 1111, 948, 908, 848 cm<sup>-1</sup>. <sup>1</sup>H NMR (250 MHz, CDCl<sub>3</sub>): δ 4.6 (s, 2H, -CH<sub>2</sub>-), 6.98-7.02 (d, *J* = 8.25 Hz, 1H, 1 x CH arom.), 7.54-7.60 (m, 2H, 2 x CH arom.), 9.90 (s, 1H, D<sub>2</sub>O exchangeable, Ph-OH), 11.08 (s, 1H, Ph-CHO) ppm. <sup>13</sup>C NMR (63 MHz, CDCl<sub>3</sub>): δ 45.16, 118.19, 120.22, 129.10, 133.56, 137.24, 161.48, 196.11 ppm.

**Preparation of 3-(3-formyl-4-hydroxybenzyl)-3-methylimidazolium chloride**

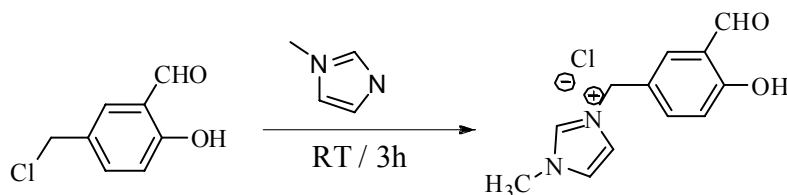

To the solution of 1-methylimidazole (7 mL, 70.17 mmol) in toluene (15 mL) at room temperature was added 5-chloromethyl-2-hydroxybenzaldehyde (10 g, 58.48 mmol) under nitrogen atmosphere. The resulting solution was stirred at room temperature for 3 h with constant stirring. The solid separated out was washed with ether (3 x 10 mL) and dried to give pale yellow solid product (14.5 g) in 97% yield.

**Preparation of 3-(3-formyl-4-hydroxybenzyl)-3-methylimidazolium  
hexafluorophosphate, 2.**

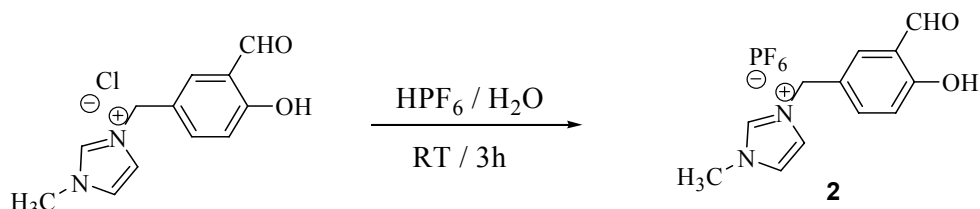

To a solution of 3-(3-formyl-4-hydroxybenzyl)-3-methylimidazolium chloride (14.8 g, 58.73 mmol) in water (100 mL) was added aqueous solution of HPF<sub>6</sub> (60 w % solution, 12.8 mL, 88.09 mmol) while cooling in ice bath over 1 h. After the addition was completed, the reaction was stirred at room temperature for 3 h. The solid product was filtered, washed with water and dried. The yield of the product was 22.04g, (99%).

**Characterization data of compound 2:**

m.p. 133 - 135 °C. IR (KBr): 3164, 2884, 1662, 1573, 1489, 1458, 1285, 1249, 1208, 1152, 825, 759, 717, 683, 660, 623, 558 cm<sup>-1</sup>. <sup>1</sup>H NMR (250 MHz, DMSO-d<sup>6</sup>): δ 3.85 (s, 3H, N-CH<sub>3</sub>-), 5.36 (s, 2H, -CH<sub>2</sub>-), 7.04-7.08 (d, *J* = 8.5 Hz, 1H, 1 x CH arom.), 7.59-7.63 (m, 2H, 2 x CH arom.), 7.69 (m, 1H, 1 x CH arom.), 7.78 (m, 1H, 1 x CH arom.), 9.16 (s, 1H, 1 x CH arom.), 10.30 (s, 1H, D<sub>2</sub>O exchangeable, Ph-OH), 10.98 (s, 1H, Ph-CHO) ppm. <sup>13</sup>C NMR (63 MHz, DMSO-d<sup>6</sup>): δ 35.84, 51.09, 118.03, 122.14, 122.47, 123.98, 125.71, 128.93, 136.47, 136.60, 161.09, 190.39 ppm. <sup>31</sup>P NMR (101 MHz, DMSO-d<sup>6</sup>): -159.43 to -117.33 ppm (septet). <sup>19</sup>F NMR (235 MHz, DMSO-d<sup>6</sup>): -67.82 to -64.81 ppm (doublet). ESI MS: In positive mode peaks at *m/z* 217.1 (100%, [C<sub>12</sub>H<sub>13</sub>N<sub>2</sub>O<sub>2</sub>]<sup>+</sup>) a.m.u. and in negative mode peak at *m/z* 145.0 (100%, [PF<sub>6</sub>]<sup>-</sup>) a.m.u. HRMS [C<sub>12</sub>H<sub>13</sub>N<sub>2</sub>O<sub>2</sub>]<sup>+</sup> Calcd.: 217.0977 Found: 217.0972.

**Preparation of 3-(3-oxime-4-hydroxybenzyl)-3-methylimidazolium  
hexafluorophosphate, 3.**

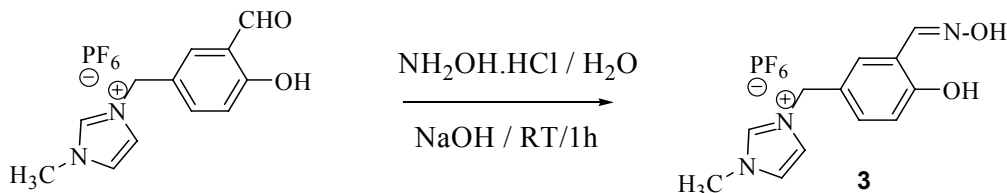

To a solution of 3-(3-oxime-4-hydroxybenzyl)-3-methylimidazolium hexafluorophosphate, 2, (10 g, 27.62 mmol) in 10 mL of ethanol was added NaOH (2.76 g, 69.05 mmol) in 25 mL of water with constant stirring at 25-30 °C. To this was added drop wise hydroxylamine hydrochloride (2.28 g, 33.14 mmol) in 25 mL water. The resultant solution was stirred for 1 h. The solution was neutralized by addition of dilute HCl and the precipitate thus formed was filtered. The crude product was recrystallized by hot water and dried. The yield of the product was 5.36 g (52%).

**Characterization data of compound 3:**

m.p. 135 - 137 °C. IR (KBr): 3365, 1627, 1569, 1507, 1399, 1359, 1313, 1271, 1168, 1130, 1018, 833, 674, 623, 557  $\text{cm}^{-1}$ .  $^1\text{H}$  NMR (250 MHz,  $\text{DMSO}-d_6$ ):  $\delta$  3.85 (s, 3H, N- $\text{CH}_3$ ), 5.32 (s, 2H,  $-\text{CH}_2-$ ), 6.92-6.96 (d,  $J = 8.25$  Hz, 1H, 1 x  $\text{CH}$  arom.), 7.30-7.34 (dd,  $J = 10.5$  Hz, 2H, 2 x  $\text{CH}$  arom.), 7.61-7.62 (m, 1H, 1 x  $\text{CH}$  arom.), 7.70 (m, 1H, 1 x  $\text{CH}$  arom.), 7.76-7.77 (m, 1H, 1 x  $\text{CH}$  arom.), 8.31 (s, 1H,  $-\text{CH}-\text{N}-\text{OH}$ ), 9.14 (s, 1H, 1 x  $\text{CH}$  arom.), 10.30 (bs, 1H,  $\text{D}_2\text{O}$  exchangeable, Ph- $\text{OH}$ ), 11.37 (bs, 1H,  $\text{D}_2\text{O}$  exchangeable, N- $\text{OH}$ ) ppm.  $^{13}\text{C}$  NMR (63 MHz,  $\text{DMSO}-d_6$ ):  $\delta$  35.83, 51.41, 116.59, 118.88, 122.19, 123.93, 125.53, 127.61, 130.88, 136.39, 145.96, 156.15 ppm.  $^{31}\text{P}$  NMR (101 MHz,  $\text{DMSO}-d_6$ ): -159.43 to -117.35 ppm (septet).  $^{19}\text{F}$  NMR (235 MHz,  $\text{DMSO}-d_6$ ): -67.83 to -64.81 ppm (doublet). ESI MS: In positive mode peaks at  $m/z$  232.1 (100%,  $[\text{C}_{12}\text{H}_{14}\text{N}_3\text{O}_2]^+$ ) a.m.u. and in negative mode peak at  $m/z$  144.6 (100%,  $[\text{PF}_6^-]$ ) a.m.u. HRMS  $[\text{C}_{12}\text{H}_{14}\text{N}_3\text{O}_2]^+$  Calcd.: 232.1086 Found: 232.1086

**Preparation of IL-bis(oxime)-Cu<sup>II</sup>, 4.**

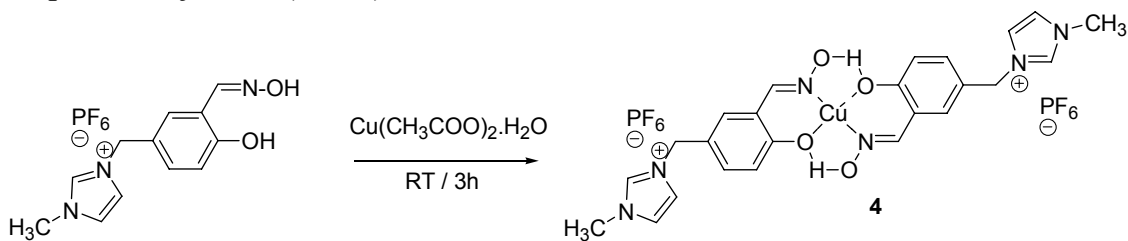

To a well stirred solution of 3-(3-oxime-4-hydroxybenzyl)-3-methylimidazolium hexafluorophosphate, 3, (0.1 g, 0.266 mmol) in 3 mL of methanol was added drop wise copper (II) acetate monohydrate (0.026 g, 0.133 mmol) dissolved in 3 mL of methanol, at room temperature. The reaction was stirred for 3h. The precipitate formed was filtered, washed with methanol and dried. The product was recrystallized by hot methanol-water to give dark brown crystals (0.098 g) in 70% yield.

**Characterization data of compound 4:**

IR (KBr): 3172, 3121, 1647, 1613, 1487, 1419, 1338, 1304, 1166, 1027, 825, 750, 670, 615, 553 cm<sup>-1</sup>. HR-ESI-MS: In positive mode peaks at 670.0961 a.m.u. [<sup>63</sup>Cu(C<sub>24</sub>H<sub>26</sub>N<sub>6</sub>O<sub>4</sub>PF<sub>6</sub>)] and 672.0961 a.m.u. [<sup>65</sup>Cu(C<sub>24</sub>H<sub>26</sub>N<sub>6</sub>O<sub>4</sub>PF<sub>6</sub>)], and in negative mode peak at 145 a.m.u.([PF<sub>6</sub>]<sup>-</sup>)

***Preparation of IL-salen-Cu<sup>II</sup>, 5:***

To a well stirred solution of Cu(CH<sub>3</sub>COO)<sub>2</sub> · H<sub>2</sub>O (0.054 g, 0.276 mmol) in 100 mL of dry methanol, under reflux, were added separately and simultaneously the solution of 3-(3-formyl-4-hydroxybenzyl)-3-methylimidazolium hexafluorophosphate, **2**, (0.100 g, 0.276 mmol) in 5 mL of methanol and ethylenediamine (0.016 g, 0.276 mmol) in 5 mL of methanol by a syringe pump over 30 minutes. The mixture was refluxed for 4 h. After cooling the reaction mixture was concentrated under reduced pressure to a volume about 10 mL and kept overnight at 0°C. Under these conditions, the product precipitated was filtered from the mother liquor and dried. The yield of the product was 0.175 g, 78.47 %.

IR (KBr): 3168, 1635, 1571, 1536, 1477, 1392, 1310, 1220, 1163, 1087, 835, 751, 620, and 555 cm<sup>-1</sup>. HR-ESI-MS: In positive mode peaks at 664.1185 a.m.u. [<sup>63</sup>Cu(C<sub>26</sub>H<sub>28</sub>N<sub>6</sub>O<sub>2</sub>PF<sub>6</sub>)] and in negative mode peak at 145 a.m.u.([PF<sub>6</sub>]<sup>-</sup>)

**General procedure for epoxidation:**

PhIO (5 mmol) was added in one portion to a stirred mixture of the respective alkene (1 mmol) and catalyst (0.1 mmol) in 2 mL of bmim[PF<sub>6</sub>] ionic liquid. The reaction was stirred at room temperature for the time specified in table **1**. The progress of the reaction was monitored at different time intervals by GCMS by extraction using diethyl ether. Results are shown in **Table 1**.

**Preparation of IL-Salen-Mn<sup>III</sup>-Cl catalyst, 6.**

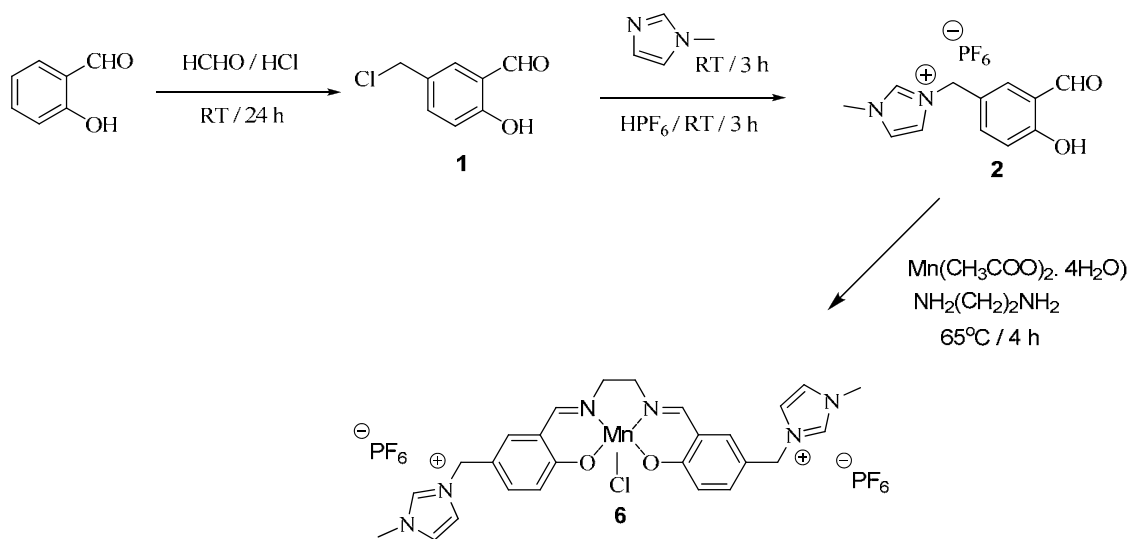

To a well stirred solution of Mn(CH<sub>3</sub>COO)<sub>2</sub>·4H<sub>2</sub>O (0.340 g, 1.38 mmol) in 100mL of dry methanol, under reflux, were added separately and simultaneously the solution of 3-(3-formyl-4-hydroxybenzyl)-3-methylimidazolium hexafluorophosphate **2** (0.500 g, 1.38 mmol) in 25 mL of methanol and ethylenediamine (0.091 g, 1.38 mmol) in 25 mL of methanol by a syringe pump over 30 minutes. The mixture was refluxed for 3 h. Then 2 mL of saturated NaCl was added and the solution was refluxed for additional 1h. After cooling, the reaction mixture was concentrated under reduced pressure to a volume about 10 mL and kept overnight at 0°C. Under these conditions, the product precipitated and was filtered from the mother liquor and dried. The yield of the product was 1.067 g, 92.78 %.

IR (KBr): 2382, 2349, 1630, 1576, 1544, 1472, 1412, 1297, 1169, 1055, 1019, 842 cm<sup>-1</sup>.

ESI-MS: In positive mode peaks at 690.9 and 693.9 a.m.u. [Mn(C<sub>26</sub>H<sub>28</sub>N<sub>6</sub>O<sub>2</sub>Cl PF<sub>6</sub>)] and in negative mode peak at 145 a.m.u.([PF<sub>6</sub>]). HRMS [Mn(C<sub>26</sub>H<sub>28</sub>N<sub>6</sub>O<sub>2</sub>Cl PF<sub>6</sub>)<sup>+</sup> Calcd.: 691.0985 Found: 691.1010.

## Crystallographic data for the structure IL-bis(oxime)-Cu<sup>II</sup>, 4.

**Table 1.** Crystal data and structure refinement for IL-bis(oxime)-Cu<sup>II</sup>, 4.

**Table 2.** Atomic coordinates and equivalent isotropic displacement parameters for IL-bis(oxime)-Cu<sup>II</sup>, 4.

**Table 3.** Bond lengths and angles for the structure IL-bis(oxime)-Cu<sup>II</sup>, 4.

**Table 4.** Anisotropic displacement parameters for the structure IL-bis(oxime)-Cu<sup>II</sup>, 4.

**Table 5.** Hydrogen coordinates and isotropic displacement parameters for the structure IL-bis(oxime)-Cu<sup>II</sup>, 4.

**Table 6.** Torsion angles for the structure IL-bis(oxime)-Cu<sup>II</sup>, 4.

Table 1. Crystal data and structure refinement for IL-bis(oxime)-Cu<sup>II</sup>, 4.

|                                   |                                                                                                 |                 |
|-----------------------------------|-------------------------------------------------------------------------------------------------|-----------------|
| Identification code               | rs0101                                                                                          |                 |
| Empirical formula                 | C <sub>24</sub> H <sub>26</sub> Cu F <sub>12</sub> N <sub>6</sub> O <sub>4</sub> P <sub>2</sub> |                 |
| Formula weight                    | 815.99                                                                                          |                 |
| Temperature                       | 100(2) K                                                                                        |                 |
| Wavelength                        | 0.71073 Å                                                                                       |                 |
| Crystal system                    | Triclinic                                                                                       |                 |
| Space group                       | P-1                                                                                             |                 |
| Unit cell dimensions              | a = 10.115(4) Å                                                                                 | α = 70.115(8)°. |
|                                   | b = 18.066(7) Å                                                                                 | β = 85.613(8)°. |
|                                   | c = 18.153(6) Å                                                                                 | γ = 74.682(7)°. |
| Volume                            | 3008.5(19) Å <sup>3</sup>                                                                       |                 |
| Z                                 | 4                                                                                               |                 |
| Density (calculated)              | 1.802 Mg/m <sup>3</sup>                                                                         |                 |
| Absorption coefficient            | 0.952 mm <sup>-1</sup>                                                                          |                 |
| F(000)                            | 1644                                                                                            |                 |
| Crystal size                      | 0.20 x 0.15 x 0.10 mm <sup>3</sup>                                                              |                 |
| Theta range for data collection   | 1.19 to 28.31°.                                                                                 |                 |
| Index ranges                      | -13 ≤ h ≤ 13, -23 ≤ k ≤ 20, -20 ≤ l ≤ 23                                                        |                 |
| Reflections collected             | 17825                                                                                           |                 |
| Independent reflections           | 13069 [R(int) = 0.0544]                                                                         |                 |
| Completeness to theta = 26.00°    | 97.1 %                                                                                          |                 |
| Absorption correction             | Not measured                                                                                    |                 |
| Refinement method                 | Full-matrix least-squares on F <sup>2</sup>                                                     |                 |
| Data / restraints / parameters    | 13069 / 0 / 891                                                                                 |                 |
| Goodness-of-fit on F <sup>2</sup> | 0.965                                                                                           |                 |
| Final R indices [I > 2σ(I)]       | R1 = 0.0802, wR2 = 0.1615                                                                       |                 |
| R indices (all data)              | R1 = 0.1575, wR2 = 0.2037                                                                       |                 |
| Largest diff. peak and hole       | 0.906 and -0.735 e.Å <sup>-3</sup>                                                              |                 |



Table 2. Atomic coordinates ( $\times 10^4$ ) and equivalent isotropic displacement parameters ( $\text{\AA}^2 \times 10^3$ ) for IL-bis(oxime)-Cu<sup>II</sup>, **4**. U(eq) is defined as one third of the trace of the orthogonalized U<sup>ij</sup> tensor.

|       | x        | y        | z       | U(eq) |
|-------|----------|----------|---------|-------|
| Cu(1) | 7695(1)  | 8683(1)  | 5029(1) | 16(1) |
| Cu(2) | 2992(1)  | 6148(1)  | 4852(1) | 17(1) |
| N(11) | 9283(5)  | 8954(3)  | 4438(3) | 19(1) |
| N(12) | 11321(5) | 7068(3)  | 1903(3) | 16(1) |
| N(13) | 11337(5) | 7981(3)  | 772(3)  | 21(1) |
| O(11) | 7900(4)  | 7755(2)  | 4725(2) | 17(1) |
| O(12) | 9626(5)  | 9656(3)  | 4442(2) | 23(1) |
| C(11) | 10072(6) | 8581(4)  | 4012(3) | 18(1) |
| C(12) | 9903(6)  | 7859(4)  | 3918(3) | 18(1) |
| C(13) | 8832(6)  | 7472(4)  | 4265(3) | 16(1) |
| C(14) | 8772(7)  | 6780(4)  | 4104(3) | 19(1) |
| C(15) | 9702(7)  | 6466(4)  | 3622(3) | 20(2) |
| C(16) | 10754(6) | 6835(4)  | 3281(3) | 16(1) |
| C(17) | 10840(6) | 7513(4)  | 3436(3) | 16(1) |
| C(18) | 11716(7) | 6523(4)  | 2711(3) | 21(2) |
| C(19) | 12048(7) | 7550(4)  | 1429(4) | 22(2) |
| C(20) | 10099(6) | 7204(4)  | 1537(4) | 22(2) |
| C(21) | 10099(7) | 7780(4)  | 830(4)  | 21(2) |
| C(22) | 11794(7) | 8586(4)  | 107(4)  | 33(2) |
| N(31) | 6042(5)  | 8458(3)  | 5561(3) | 17(1) |
| N(32) | 3501(5)  | 10653(3) | 7878(3) | 17(1) |
| N(33) | 4296(5)  | 9846(3)  | 9021(3) | 21(1) |
| O(31) | 7530(4)  | 9588(3)  | 5359(2) | 20(1) |
| O(32) | 5657(4)  | 7774(3)  | 5551(2) | 20(1) |
| C(31) | 5188(7)  | 8882(4)  | 5922(3) | 20(1) |
| C(32) | 5378(6)  | 9602(4)  | 6026(3) | 17(1) |
| C(33) | 6536(6)  | 9918(4)  | 5760(3) | 18(1) |
| C(34) | 6639(7)  | 10597(4) | 5935(3) | 21(2) |
| C(35) | 5639(6)  | 10970(4) | 6338(3) | 20(1) |
| C(36) | 4463(6)  | 10698(4) | 6580(3) | 18(1) |

Supplementary Material (ESI) for Dalton Transactions  
This journal is (c) The Royal Society of Chemistry 2008

|       |          |          |         |       |
|-------|----------|----------|---------|-------|
| C(37) | 4360(7)  | 10003(4) | 6434(3) | 20(2) |
| C(38) | 3385(7)  | 11097(4) | 7035(3) | 27(2) |
| C(39) | 4596(7)  | 10107(4) | 8276(3) | 19(1) |
| C(40) | 2458(7)  | 10742(4) | 8401(4) | 25(2) |
| C(41) | 2973(7)  | 10222(4) | 9110(4) | 28(2) |
| C(42) | 5197(7)  | 9177(4)  | 9616(4) | 30(2) |
| N(51) | 1390(5)  | 5885(3)  | 5427(3) | 18(1) |
| N(52) | -750(5)  | 7903(3)  | 7930(3) | 17(1) |
| N(53) | -882(5)  | 7158(3)  | 9134(3) | 17(1) |
| O(51) | 2798(4)  | 7061(2)  | 5177(2) | 20(1) |
| O(52) | 1014(5)  | 5202(3)  | 5415(2) | 26(1) |
| C(51) | 581(6)   | 6279(4)  | 5828(3) | 17(1) |
| C(52) | 766(6)   | 6989(4)  | 5950(3) | 15(1) |
| C(53) | 1870(6)  | 7341(4)  | 5637(3) | 17(1) |
| C(54) | 1970(7)  | 8019(4)  | 5823(4) | 22(2) |
| C(55) | 1018(7)  | 8353(4)  | 6276(3) | 20(2) |
| C(56) | -103(6)  | 8023(4)  | 6575(3) | 18(1) |
| C(57) | -204(6)  | 7351(4)  | 6414(3) | 20(1) |
| C(58) | -1116(7) | 8378(4)  | 7098(3) | 26(2) |
| C(59) | -1553(7) | 7547(4)  | 8454(4) | 20(1) |
| C(60) | 503(7)   | 7742(4)  | 8281(4) | 24(2) |
| C(61) | 413(7)   | 7282(4)  | 9030(4) | 24(2) |
| C(62) | -1425(7) | 6652(4)  | 9842(3) | 28(2) |
| N(71) | 4627(6)  | 6410(3)  | 4310(3) | 20(1) |
| N(72) | 6497(6)  | 4706(3)  | 1607(3) | 24(1) |
| N(73) | 5148(5)  | 5560(3)  | 654(3)  | 21(1) |
| O(71) | 3154(4)  | 5261(2)  | 4482(2) | 20(1) |
| O(72) | 5047(5)  | 7053(3)  | 4395(2) | 22(1) |
| C(71) | 5426(6)  | 6041(4)  | 3897(3) | 18(1) |
| C(72) | 5214(6)  | 5351(4)  | 3724(3) | 18(1) |
| C(73) | 4103(6)  | 4996(4)  | 4025(3) | 17(1) |
| C(74) | 4027(7)  | 4335(4)  | 3797(4) | 22(2) |
| C(75) | 4959(7)  | 4042(4)  | 3311(3) | 21(2) |
| C(76) | 6047(7)  | 4393(4)  | 3009(3) | 20(1) |
| C(77) | 6153(6)  | 5040(4)  | 3229(3) | 19(1) |
| C(78) | 6999(7)  | 4149(4)  | 2404(4) | 27(2) |

Supplementary Material (ESI) for Dalton Transactions  
This journal is (c) The Royal Society of Chemistry 2008

|        |         |          |         |        |
|--------|---------|----------|---------|--------|
| C(79)  | 5217(7) | 5137(4)  | 1418(4) | 22(2)  |
| C(80)  | 7272(7) | 4840(4)  | 936(4)  | 25(2)  |
| C(81)  | 6411(7) | 5391(4)  | 351(4)  | 27(2)  |
| C(82)  | 3926(7) | 6177(4)  | 248(4)  | 29(2)  |
| P(101) | 6050(2) | 7313(1)  | 1561(1) | 20(1)  |
| F(101) | 5149(4) | 8171(2)  | 1576(2) | 45(1)  |
| F(102) | 6944(4) | 7230(3)  | 2280(2) | 44(1)  |
| F(103) | 6940(5) | 6460(2)  | 1531(2) | 45(1)  |
| F(104) | 5132(4) | 7405(3)  | 836(2)  | 40(1)  |
| F(105) | 5011(4) | 6873(2)  | 2154(2) | 34(1)  |
| F(106) | 7061(4) | 7757(2)  | 959(2)  | 30(1)  |
| P(201) | 1195(2) | 4724(1)  | 1731(1) | 25(1)  |
| F(201) | -178(5) | 5316(3)  | 1876(3) | 74(2)  |
| F(202) | 2027(4) | 5377(3)  | 1703(2) | 44(1)  |
| F(203) | 2550(4) | 4159(2)  | 1538(2) | 45(1)  |
| F(204) | 357(4)  | 4074(3)  | 1761(3) | 47(1)  |
| F(205) | 1504(5) | 4313(3)  | 2633(2) | 61(2)  |
| F(206) | 903(5)  | 5141(3)  | 809(3)  | 65(2)  |
| P(301) | 1350(2) | 9974(1)  | 1577(1) | 27(1)  |
| F(301) | 2678(4) | 9613(2)  | 1146(2) | 35(1)  |
| F(302) | 2236(4) | 10374(3) | 1942(3) | 56(1)  |
| F(303) | 29(5)   | 10348(3) | 1990(3) | 62(2)  |
| F(304) | 478(5)  | 9601(4)  | 1193(4) | 104(3) |
| F(305) | 1699(7) | 9183(3)  | 2299(3) | 101(2) |
| F(306) | 1066(5) | 10783(3) | 846(3)  | 79(2)  |
| P(401) | 5550(2) | 2247(1)  | 1798(1) | 20(1)  |
| F(401) | 4481(4) | 2702(2)  | 1076(2) | 36(1)  |
| F(402) | 6703(5) | 2122(4)  | 1195(2) | 78(2)  |
| F(403) | 6617(4) | 1793(3)  | 2511(2) | 45(1)  |
| F(404) | 4369(5) | 2384(3)  | 2394(2) | 68(2)  |
| F(405) | 5220(7) | 1430(3)  | 1881(3) | 97(2)  |
| F(406) | 5847(6) | 3079(3)  | 1716(3) | 79(2)  |

---

Table 3. Bond lengths [ $\text{\AA}$ ] and angles [ $^\circ$ ] for IL-bis(oxime)-Cu<sup>II</sup>, 4.

---

|              |          |
|--------------|----------|
| Cu(1)-O(31)  | 1.890(4) |
| Cu(1)-O(11)  | 1.893(4) |
| Cu(1)-N(31)  | 1.933(5) |
| Cu(1)-N(11)  | 1.941(5) |
| Cu(2)-O(51)  | 1.892(4) |
| Cu(2)-O(71)  | 1.903(4) |
| Cu(2)-N(51)  | 1.937(5) |
| Cu(2)-N(71)  | 1.943(5) |
| N(11)-C(11)  | 1.291(7) |
| N(11)-O(12)  | 1.402(6) |
| N(12)-C(19)  | 1.332(7) |
| N(12)-C(20)  | 1.372(7) |
| N(12)-C(18)  | 1.478(7) |
| N(13)-C(19)  | 1.323(7) |
| N(13)-C(21)  | 1.381(8) |
| N(13)-C(22)  | 1.466(8) |
| O(11)-C(13)  | 1.327(7) |
| O(12)-H(12)  | 0.8400   |
| C(11)-C(12)  | 1.426(8) |
| C(11)-H(11)  | 0.9500   |
| C(12)-C(17)  | 1.409(8) |
| C(12)-C(13)  | 1.433(8) |
| C(13)-C(14)  | 1.395(8) |
| C(14)-C(15)  | 1.380(8) |
| C(14)-H(14)  | 0.9500   |
| C(15)-C(16)  | 1.397(8) |
| C(15)-H(15)  | 0.9500   |
| C(16)-C(17)  | 1.373(8) |
| C(16)-C(18)  | 1.512(8) |
| C(17)-H(17)  | 0.9500   |
| C(18)-H(18A) | 0.9900   |
| C(18)-H(18B) | 0.9900   |
| C(19)-H(19)  | 0.9500   |
| C(20)-C(21)  | 1.349(8) |

Supplementary Material (ESI) for Dalton Transactions  
This journal is (c) The Royal Society of Chemistry 2008

|              |          |
|--------------|----------|
| C(20)-H(20)  | 0.9500   |
| C(21)-H(21)  | 0.9500   |
| C(22)-H(22A) | 0.9800   |
| C(22)-H(22B) | 0.9800   |
| C(22)-H(22C) | 0.9800   |
| N(31)-C(31)  | 1.292(7) |
| N(31)-O(32)  | 1.396(5) |
| N(32)-C(39)  | 1.335(8) |
| N(32)-C(40)  | 1.379(8) |
| N(32)-C(38)  | 1.463(7) |
| N(33)-C(39)  | 1.314(7) |
| N(33)-C(41)  | 1.356(8) |
| N(33)-C(42)  | 1.463(8) |
| O(31)-C(33)  | 1.328(7) |
| O(32)-H(32)  | 0.8400   |
| C(31)-C(32)  | 1.439(8) |
| C(31)-H(31)  | 0.9500   |
| C(32)-C(37)  | 1.409(8) |
| C(32)-C(33)  | 1.417(8) |
| C(33)-C(34)  | 1.398(8) |
| C(34)-C(35)  | 1.369(8) |
| C(34)-H(34)  | 0.9500   |
| C(35)-C(36)  | 1.390(8) |
| C(35)-H(35)  | 0.9500   |
| C(36)-C(37)  | 1.399(8) |
| C(36)-C(38)  | 1.499(9) |
| C(37)-H(37)  | 0.9500   |
| C(38)-H(38A) | 0.9900   |
| C(38)-H(38B) | 0.9900   |
| C(39)-H(39)  | 0.9500   |
| C(40)-C(41)  | 1.354(9) |
| C(40)-H(40)  | 0.9500   |
| C(41)-H(41)  | 0.9500   |
| C(42)-H(42A) | 0.9800   |
| C(42)-H(42B) | 0.9800   |
| C(42)-H(42C) | 0.9800   |

Supplementary Material (ESI) for Dalton Transactions  
This journal is (c) The Royal Society of Chemistry 2008

|              |          |
|--------------|----------|
| N(51)-C(51)  | 1.289(7) |
| N(51)-O(52)  | 1.391(6) |
| N(52)-C(59)  | 1.311(7) |
| N(52)-C(60)  | 1.379(8) |
| N(52)-C(58)  | 1.480(7) |
| N(53)-C(59)  | 1.329(7) |
| N(53)-C(61)  | 1.375(8) |
| N(53)-C(62)  | 1.465(7) |
| O(51)-C(53)  | 1.324(7) |
| O(52)-H(52)  | 0.8400   |
| C(51)-C(52)  | 1.435(8) |
| C(51)-H(51)  | 0.9500   |
| C(52)-C(53)  | 1.417(8) |
| C(52)-C(57)  | 1.417(8) |
| C(53)-C(54)  | 1.405(8) |
| C(54)-C(55)  | 1.370(8) |
| C(54)-H(54)  | 0.9500   |
| C(55)-C(56)  | 1.406(8) |
| C(55)-H(55)  | 0.9500   |
| C(56)-C(57)  | 1.373(8) |
| C(56)-C(58)  | 1.510(8) |
| C(57)-H(57)  | 0.9500   |
| C(58)-H(58A) | 0.9900   |
| C(58)-H(58B) | 0.9900   |
| C(59)-H(59)  | 0.9500   |
| C(60)-C(61)  | 1.342(8) |
| C(60)-H(60)  | 0.9500   |
| C(61)-H(61)  | 0.9500   |
| C(62)-H(62A) | 0.9800   |
| C(62)-H(62B) | 0.9800   |
| C(62)-H(62C) | 0.9800   |
| N(71)-C(71)  | 1.274(7) |
| N(71)-O(72)  | 1.394(6) |
| N(72)-C(79)  | 1.324(8) |
| N(72)-C(80)  | 1.382(8) |
| N(72)-C(78)  | 1.490(8) |

Supplementary Material (ESI) for Dalton Transactions  
This journal is (c) The Royal Society of Chemistry 2008

|               |          |
|---------------|----------|
| N(73)-C(79)   | 1.334(7) |
| N(73)-C(81)   | 1.352(8) |
| N(73)-C(82)   | 1.472(8) |
| O(71)-C(73)   | 1.320(7) |
| O(72)-H(72)   | 0.8400   |
| C(71)-C(72)   | 1.456(8) |
| C(71)-H(71)   | 0.9500   |
| C(72)-C(77)   | 1.398(8) |
| C(72)-C(73)   | 1.421(8) |
| C(73)-C(74)   | 1.413(8) |
| C(74)-C(75)   | 1.369(9) |
| C(74)-H(74)   | 0.9500   |
| C(75)-C(76)   | 1.398(9) |
| C(75)-H(75)   | 0.9500   |
| C(76)-C(77)   | 1.389(8) |
| C(76)-C(78)   | 1.506(8) |
| C(77)-H(77)   | 0.9500   |
| C(78)-H(78A)  | 0.9900   |
| C(78)-H(78B)  | 0.9900   |
| C(79)-H(79)   | 0.9500   |
| C(80)-C(81)   | 1.357(9) |
| C(80)-H(80)   | 0.9500   |
| C(81)-H(81)   | 0.9500   |
| C(82)-H(82A)  | 0.9800   |
| C(82)-H(82B)  | 0.9800   |
| C(82)-H(82C)  | 0.9800   |
| P(101)-F(103) | 1.584(4) |
| P(101)-F(101) | 1.586(4) |
| P(101)-F(102) | 1.587(4) |
| P(101)-F(106) | 1.598(4) |
| P(101)-F(104) | 1.606(4) |
| P(101)-F(105) | 1.606(4) |
| P(201)-F(205) | 1.569(4) |
| P(201)-F(203) | 1.573(4) |
| P(201)-F(201) | 1.578(5) |
| P(201)-F(206) | 1.598(5) |

Supplementary Material (ESI) for Dalton Transactions  
This journal is (c) The Royal Society of Chemistry 2008

|               |          |
|---------------|----------|
| P(201)-F(204) | 1.604(4) |
| P(201)-F(202) | 1.606(4) |
| P(301)-F(305) | 1.554(5) |
| P(301)-F(304) | 1.564(5) |
| P(301)-F(306) | 1.580(5) |
| P(301)-F(303) | 1.588(5) |
| P(301)-F(302) | 1.588(4) |
| P(301)-F(301) | 1.601(4) |
| P(401)-F(405) | 1.552(5) |
| P(401)-F(402) | 1.561(5) |
| P(401)-F(406) | 1.567(5) |
| P(401)-F(404) | 1.578(5) |
| P(401)-F(403) | 1.593(4) |
| P(401)-F(401) | 1.605(4) |

|                   |            |
|-------------------|------------|
| O(31)-Cu(1)-O(11) | 178.19(18) |
| O(31)-Cu(1)-N(31) | 92.29(19)  |
| O(11)-Cu(1)-N(31) | 87.97(19)  |
| O(31)-Cu(1)-N(11) | 87.59(19)  |
| O(11)-Cu(1)-N(11) | 92.26(19)  |
| N(31)-Cu(1)-N(11) | 176.4(2)   |
| O(51)-Cu(2)-O(71) | 177.55(17) |
| O(51)-Cu(2)-N(51) | 92.01(19)  |
| O(71)-Cu(2)-N(51) | 88.51(19)  |
| O(51)-Cu(2)-N(71) | 86.80(19)  |
| O(71)-Cu(2)-N(71) | 92.8(2)    |
| N(51)-Cu(2)-N(71) | 177.9(2)   |
| C(11)-N(11)-O(12) | 113.9(5)   |
| C(11)-N(11)-Cu(1) | 128.4(4)   |
| O(12)-N(11)-Cu(1) | 117.7(4)   |
| C(19)-N(12)-C(20) | 108.7(5)   |
| C(19)-N(12)-C(18) | 125.6(5)   |
| C(20)-N(12)-C(18) | 125.5(5)   |
| C(19)-N(13)-C(21) | 108.8(5)   |
| C(19)-N(13)-C(22) | 124.8(5)   |
| C(21)-N(13)-C(22) | 126.5(5)   |



Supplementary Material (ESI) for Dalton Transactions  
This journal is (c) The Royal Society of Chemistry 2008

|                     |          |
|---------------------|----------|
| C(13)-O(11)-Cu(1)   | 129.1(4) |
| N(11)-O(12)-H(12)   | 109.5    |
| N(11)-C(11)-C(12)   | 123.4(6) |
| N(11)-C(11)-H(11)   | 118.3    |
| C(12)-C(11)-H(11)   | 118.3    |
| C(17)-C(12)-C(11)   | 117.5(6) |
| C(17)-C(12)-C(13)   | 117.9(5) |
| C(11)-C(12)-C(13)   | 124.6(6) |
| O(11)-C(13)-C(14)   | 119.5(5) |
| O(11)-C(13)-C(12)   | 122.2(5) |
| C(14)-C(13)-C(12)   | 118.3(6) |
| C(15)-C(14)-C(13)   | 121.9(6) |
| C(15)-C(14)-H(14)   | 119.0    |
| C(13)-C(14)-H(14)   | 119.0    |
| C(14)-C(15)-C(16)   | 120.4(6) |
| C(14)-C(15)-H(15)   | 119.8    |
| C(16)-C(15)-H(15)   | 119.8    |
| C(17)-C(16)-C(15)   | 118.6(6) |
| C(17)-C(16)-C(18)   | 120.9(5) |
| C(15)-C(16)-C(18)   | 120.3(5) |
| C(16)-C(17)-C(12)   | 122.8(6) |
| C(16)-C(17)-H(17)   | 118.6    |
| C(12)-C(17)-H(17)   | 118.6    |
| N(12)-C(18)-C(16)   | 109.5(5) |
| N(12)-C(18)-H(18A)  | 109.8    |
| C(16)-C(18)-H(18A)  | 109.8    |
| N(12)-C(18)-H(18B)  | 109.8    |
| C(16)-C(18)-H(18B)  | 109.8    |
| H(18A)-C(18)-H(18B) | 108.2    |
| N(13)-C(19)-N(12)   | 108.5(5) |
| N(13)-C(19)-H(19)   | 125.8    |
| N(12)-C(19)-H(19)   | 125.8    |
| C(21)-C(20)-N(12)   | 107.2(6) |
| C(21)-C(20)-H(20)   | 126.4    |
| N(12)-C(20)-H(20)   | 126.4    |
| C(20)-C(21)-N(13)   | 106.8(6) |

Supplementary Material (ESI) for Dalton Transactions  
This journal is (c) The Royal Society of Chemistry 2008

|                     |          |
|---------------------|----------|
| C(20)-C(21)-H(21)   | 126.6    |
| N(13)-C(21)-H(21)   | 126.6    |
| N(13)-C(22)-H(22A)  | 109.5    |
| N(13)-C(22)-H(22B)  | 109.5    |
| H(22A)-C(22)-H(22B) | 109.5    |
| N(13)-C(22)-H(22C)  | 109.5    |
| H(22A)-C(22)-H(22C) | 109.5    |
| H(22B)-C(22)-H(22C) | 109.5    |
| C(31)-N(31)-O(32)   | 113.4(5) |
| C(31)-N(31)-Cu(1)   | 127.9(4) |
| O(32)-N(31)-Cu(1)   | 118.6(4) |
| C(39)-N(32)-C(40)   | 108.2(5) |
| C(39)-N(32)-C(38)   | 127.4(6) |
| C(40)-N(32)-C(38)   | 124.3(5) |
| C(39)-N(33)-C(41)   | 108.4(6) |
| C(39)-N(33)-C(42)   | 124.1(6) |
| C(41)-N(33)-C(42)   | 126.9(6) |
| C(33)-O(31)-Cu(1)   | 129.3(4) |
| N(31)-O(32)-H(32)   | 109.5    |
| N(31)-C(31)-C(32)   | 123.7(6) |
| N(31)-C(31)-H(31)   | 118.1    |
| C(32)-C(31)-H(31)   | 118.1    |
| C(37)-C(32)-C(33)   | 118.5(5) |
| C(37)-C(32)-C(31)   | 117.5(6) |
| C(33)-C(32)-C(31)   | 124.0(6) |
| O(31)-C(33)-C(34)   | 118.8(6) |
| O(31)-C(33)-C(32)   | 122.5(5) |
| C(34)-C(33)-C(32)   | 118.6(6) |
| C(35)-C(34)-C(33)   | 121.6(6) |
| C(35)-C(34)-H(34)   | 119.2    |
| C(33)-C(34)-H(34)   | 119.2    |
| C(34)-C(35)-C(36)   | 121.4(6) |
| C(34)-C(35)-H(35)   | 119.3    |
| C(36)-C(35)-H(35)   | 119.3    |
| C(35)-C(36)-C(37)   | 117.9(6) |
| C(35)-C(36)-C(38)   | 121.2(6) |

Supplementary Material (ESI) for Dalton Transactions  
This journal is (c) The Royal Society of Chemistry 2008

|                     |          |
|---------------------|----------|
| C(37)-C(36)-C(38)   | 120.8(6) |
| C(36)-C(37)-C(32)   | 121.9(6) |
| C(36)-C(37)-H(37)   | 119.0    |
| C(32)-C(37)-H(37)   | 119.0    |
| N(32)-C(38)-C(36)   | 112.6(5) |
| N(32)-C(38)-H(38A)  | 109.1    |
| C(36)-C(38)-H(38A)  | 109.1    |
| N(32)-C(38)-H(38B)  | 109.1    |
| C(36)-C(38)-H(38B)  | 109.1    |
| H(38A)-C(38)-H(38B) | 107.8    |
| N(33)-C(39)-N(32)   | 109.2(6) |
| N(33)-C(39)-H(39)   | 125.4    |
| N(32)-C(39)-H(39)   | 125.4    |
| C(41)-C(40)-N(32)   | 105.8(6) |
| C(41)-C(40)-H(40)   | 127.1    |
| N(32)-C(40)-H(40)   | 127.1    |
| C(40)-C(41)-N(33)   | 108.4(6) |
| C(40)-C(41)-H(41)   | 125.8    |
| N(33)-C(41)-H(41)   | 125.8    |
| N(33)-C(42)-H(42A)  | 109.5    |
| N(33)-C(42)-H(42B)  | 109.5    |
| H(42A)-C(42)-H(42B) | 109.5    |
| N(33)-C(42)-H(42C)  | 109.5    |
| H(42A)-C(42)-H(42C) | 109.5    |
| H(42B)-C(42)-H(42C) | 109.5    |
| C(51)-N(51)-O(52)   | 113.7(5) |
| C(51)-N(51)-Cu(2)   | 127.7(4) |
| O(52)-N(51)-Cu(2)   | 118.7(4) |
| C(59)-N(52)-C(60)   | 108.4(5) |
| C(59)-N(52)-C(58)   | 125.7(5) |
| C(60)-N(52)-C(58)   | 125.9(5) |
| C(59)-N(53)-C(61)   | 107.5(5) |
| C(59)-N(53)-C(62)   | 125.1(5) |
| C(61)-N(53)-C(62)   | 127.4(5) |
| C(53)-O(51)-Cu(2)   | 129.5(4) |
| N(51)-O(52)-H(52)   | 109.5    |

Supplementary Material (ESI) for Dalton Transactions  
This journal is (c) The Royal Society of Chemistry 2008

|                     |          |
|---------------------|----------|
| N(51)-C(51)-C(52)   | 124.5(6) |
| N(51)-C(51)-H(51)   | 117.7    |
| C(52)-C(51)-H(51)   | 117.7    |
| C(53)-C(52)-C(57)   | 118.6(5) |
| C(53)-C(52)-C(51)   | 123.5(6) |
| C(57)-C(52)-C(51)   | 117.9(5) |
| O(51)-C(53)-C(54)   | 119.1(6) |
| O(51)-C(53)-C(52)   | 122.7(5) |
| C(54)-C(53)-C(52)   | 118.1(6) |
| C(55)-C(54)-C(53)   | 121.8(6) |
| C(55)-C(54)-H(54)   | 119.1    |
| C(53)-C(54)-H(54)   | 119.1    |
| C(54)-C(55)-C(56)   | 120.7(6) |
| C(54)-C(55)-H(55)   | 119.6    |
| C(56)-C(55)-H(55)   | 119.6    |
| C(57)-C(56)-C(55)   | 118.4(6) |
| C(57)-C(56)-C(58)   | 121.4(6) |
| C(55)-C(56)-C(58)   | 120.2(6) |
| C(56)-C(57)-C(52)   | 122.3(6) |
| C(56)-C(57)-H(57)   | 118.9    |
| C(52)-C(57)-H(57)   | 118.9    |
| N(52)-C(58)-C(56)   | 109.9(5) |
| N(52)-C(58)-H(58A)  | 109.7    |
| C(56)-C(58)-H(58A)  | 109.7    |
| N(52)-C(58)-H(58B)  | 109.7    |
| C(56)-C(58)-H(58B)  | 109.7    |
| H(58A)-C(58)-H(58B) | 108.2    |
| N(52)-C(59)-N(53)   | 109.7(6) |
| N(52)-C(59)-H(59)   | 125.2    |
| N(53)-C(59)-H(59)   | 125.2    |
| C(61)-C(60)-N(52)   | 106.8(6) |
| C(61)-C(60)-H(60)   | 126.6    |
| N(52)-C(60)-H(60)   | 126.6    |
| C(60)-C(61)-N(53)   | 107.7(6) |
| C(60)-C(61)-H(61)   | 126.1    |
| N(53)-C(61)-H(61)   | 126.1    |

Supplementary Material (ESI) for Dalton Transactions  
This journal is (c) The Royal Society of Chemistry 2008

|                     |          |
|---------------------|----------|
| N(53)-C(62)-H(62A)  | 109.5    |
| N(53)-C(62)-H(62B)  | 109.5    |
| H(62A)-C(62)-H(62B) | 109.5    |
| N(53)-C(62)-H(62C)  | 109.5    |
| H(62A)-C(62)-H(62C) | 109.5    |
| H(62B)-C(62)-H(62C) | 109.5    |
| C(71)-N(71)-O(72)   | 113.9(5) |
| C(71)-N(71)-Cu(2)   | 127.7(4) |
| O(72)-N(71)-Cu(2)   | 118.4(4) |
| C(79)-N(72)-C(80)   | 108.5(6) |
| C(79)-N(72)-C(78)   | 125.5(6) |
| C(80)-N(72)-C(78)   | 126.0(6) |
| C(79)-N(73)-C(81)   | 108.5(6) |
| C(79)-N(73)-C(82)   | 124.3(6) |
| C(81)-N(73)-C(82)   | 126.8(6) |
| C(73)-O(71)-Cu(2)   | 128.2(4) |
| N(71)-O(72)-H(72)   | 109.5    |
| N(71)-C(71)-C(72)   | 124.4(6) |
| N(71)-C(71)-H(71)   | 117.8    |
| C(72)-C(71)-H(71)   | 117.8    |
| C(77)-C(72)-C(73)   | 119.7(6) |
| C(77)-C(72)-C(71)   | 117.2(6) |
| C(73)-C(72)-C(71)   | 123.0(6) |
| O(71)-C(73)-C(74)   | 119.8(6) |
| O(71)-C(73)-C(72)   | 123.8(5) |
| C(74)-C(73)-C(72)   | 116.4(6) |
| C(75)-C(74)-C(73)   | 122.8(6) |
| C(75)-C(74)-H(74)   | 118.6    |
| C(73)-C(74)-H(74)   | 118.6    |
| C(74)-C(75)-C(76)   | 120.9(6) |
| C(74)-C(75)-H(75)   | 119.5    |
| C(76)-C(75)-H(75)   | 119.5    |
| C(77)-C(76)-C(75)   | 117.5(6) |
| C(77)-C(76)-C(78)   | 119.8(6) |
| C(75)-C(76)-C(78)   | 122.4(6) |
| C(76)-C(77)-C(72)   | 122.6(6) |

Supplementary Material (ESI) for Dalton Transactions  
This journal is (c) The Royal Society of Chemistry 2008

|                      |          |
|----------------------|----------|
| C(76)-C(77)-H(77)    | 118.7    |
| C(72)-C(77)-H(77)    | 118.7    |
| N(72)-C(78)-C(76)    | 109.5(5) |
| N(72)-C(78)-H(78A)   | 109.8    |
| C(76)-C(78)-H(78A)   | 109.8    |
| N(72)-C(78)-H(78B)   | 109.8    |
| C(76)-C(78)-H(78B)   | 109.8    |
| H(78A)-C(78)-H(78B)  | 108.2    |
| N(72)-C(79)-N(73)    | 108.7(6) |
| N(72)-C(79)-H(79)    | 125.6    |
| N(73)-C(79)-H(79)    | 125.6    |
| C(81)-C(80)-N(72)    | 106.1(6) |
| C(81)-C(80)-H(80)    | 126.9    |
| N(72)-C(80)-H(80)    | 126.9    |
| N(73)-C(81)-C(80)    | 108.1(6) |
| N(73)-C(81)-H(81)    | 126.0    |
| C(80)-C(81)-H(81)    | 126.0    |
| N(73)-C(82)-H(82A)   | 109.5    |
| N(73)-C(82)-H(82B)   | 109.5    |
| H(82A)-C(82)-H(82B)  | 109.5    |
| N(73)-C(82)-H(82C)   | 109.5    |
| H(82A)-C(82)-H(82C)  | 109.5    |
| H(82B)-C(82)-H(82C)  | 109.5    |
| F(103)-P(101)-F(101) | 179.0(2) |
| F(103)-P(101)-F(102) | 90.5(2)  |
| F(101)-P(101)-F(102) | 90.4(2)  |
| F(103)-P(101)-F(106) | 90.1(2)  |
| F(101)-P(101)-F(106) | 89.6(2)  |
| F(102)-P(101)-F(106) | 90.7(2)  |
| F(103)-P(101)-F(104) | 90.1(2)  |
| F(101)-P(101)-F(104) | 89.0(2)  |
| F(102)-P(101)-F(104) | 179.4(3) |
| F(106)-P(101)-F(104) | 89.5(2)  |
| F(103)-P(101)-F(105) | 90.3(2)  |
| F(101)-P(101)-F(105) | 90.0(2)  |
| F(102)-P(101)-F(105) | 90.3(2)  |

Supplementary Material (ESI) for Dalton Transactions  
This journal is (c) The Royal Society of Chemistry 2008

|                      |          |
|----------------------|----------|
| F(106)-P(101)-F(105) | 178.9(2) |
| F(104)-P(101)-F(105) | 89.5(2)  |
| F(205)-P(201)-F(203) | 91.3(3)  |
| F(205)-P(201)-F(201) | 91.7(3)  |
| F(203)-P(201)-F(201) | 177.0(3) |
| F(205)-P(201)-F(206) | 179.2(3) |
| F(203)-P(201)-F(206) | 88.0(3)  |
| F(201)-P(201)-F(206) | 89.0(3)  |
| F(205)-P(201)-F(204) | 90.2(2)  |
| F(203)-P(201)-F(204) | 90.7(2)  |
| F(201)-P(201)-F(204) | 89.6(3)  |
| F(206)-P(201)-F(204) | 90.3(2)  |
| F(205)-P(201)-F(202) | 89.7(2)  |
| F(203)-P(201)-F(202) | 89.6(2)  |
| F(201)-P(201)-F(202) | 90.2(2)  |
| F(206)-P(201)-F(202) | 89.8(3)  |
| F(204)-P(201)-F(202) | 179.7(3) |
| F(305)-P(301)-F(304) | 91.5(4)  |
| F(305)-P(301)-F(306) | 177.3(4) |
| F(304)-P(301)-F(306) | 90.8(4)  |
| F(305)-P(301)-F(303) | 91.4(3)  |
| F(304)-P(301)-F(303) | 90.7(3)  |
| F(306)-P(301)-F(303) | 90.1(3)  |
| F(305)-P(301)-F(302) | 90.2(3)  |
| F(304)-P(301)-F(302) | 178.2(4) |
| F(306)-P(301)-F(302) | 87.5(3)  |
| F(303)-P(301)-F(302) | 89.7(2)  |
| F(305)-P(301)-F(301) | 89.7(3)  |
| F(304)-P(301)-F(301) | 89.4(2)  |
| F(306)-P(301)-F(301) | 88.8(3)  |
| F(303)-P(301)-F(301) | 178.9(3) |
| F(302)-P(301)-F(301) | 90.2(2)  |
| F(405)-P(401)-F(402) | 91.9(4)  |
| F(405)-P(401)-F(406) | 178.7(4) |
| F(402)-P(401)-F(406) | 89.2(3)  |
| F(405)-P(401)-F(404) | 88.4(3)  |

Supplementary Material (ESI) for Dalton Transactions  
This journal is (c) The Royal Society of Chemistry 2008

|                      |          |
|----------------------|----------|
| F(402)-P(401)-F(404) | 179.0(3) |
| F(406)-P(401)-F(404) | 90.5(3)  |
| F(405)-P(401)-F(403) | 90.4(3)  |
| F(402)-P(401)-F(403) | 91.4(2)  |
| F(406)-P(401)-F(403) | 90.4(3)  |
| F(404)-P(401)-F(403) | 89.6(2)  |
| F(405)-P(401)-F(401) | 89.6(2)  |
| F(402)-P(401)-F(401) | 88.3(2)  |
| F(406)-P(401)-F(401) | 89.7(2)  |
| F(404)-P(401)-F(401) | 90.7(2)  |
| F(403)-P(401)-F(401) | 179.7(3) |

---

Symmetry transformations used to generate equivalent atoms:



Table 4. Anisotropic displacement parameters ( $\text{\AA}^2 \times 10^3$ ) for IL-bis(oxime)-Cu<sup>II</sup>, **4**.  
 The anisotropic displacement factor exponent takes the form:  $-2\pi^2 [h^2 a^{*2} U^{11} + \dots + 2hk a^* b^* U^{12}]$

|       | U <sup>11</sup> | U <sup>22</sup> | U <sup>33</sup> | U <sup>23</sup> | U <sup>13</sup> | U <sup>12</sup> |
|-------|-----------------|-----------------|-----------------|-----------------|-----------------|-----------------|
| Cu(1) | 18(1)           | 13(1)           | 18(1)           | -7(1)           | 0(1)            | -6(1)           |
| Cu(2) | 20(1)           | 14(1)           | 17(1)           | -5(1)           | -1(1)           | -6(1)           |
| N(11) | 26(3)           | 11(3)           | 22(3)           | -1(2)           | -4(2)           | -12(2)          |
| N(12) | 18(3)           | 17(3)           | 14(3)           | -8(2)           | -2(2)           | -1(2)           |
| N(13) | 18(3)           | 22(3)           | 21(3)           | -7(2)           | 0(2)            | -4(3)           |
| O(11) | 20(2)           | 16(2)           | 18(2)           | -5(2)           | 0(2)            | -9(2)           |
| O(12) | 26(3)           | 19(2)           | 32(3)           | -13(2)          | 3(2)            | -13(2)          |
| C(11) | 21(4)           | 19(3)           | 14(3)           | -3(3)           | -2(3)           | -10(3)          |
| C(12) | 20(4)           | 22(4)           | 15(3)           | -10(3)          | -1(3)           | -6(3)           |
| C(13) | 17(4)           | 17(3)           | 18(3)           | -9(3)           | 0(3)            | -6(3)           |
| C(14) | 22(4)           | 12(3)           | 25(4)           | -5(3)           | -6(3)           | -8(3)           |
| C(15) | 27(4)           | 15(3)           | 18(3)           | -3(3)           | -10(3)          | -3(3)           |
| C(16) | 15(3)           | 14(3)           | 18(3)           | -5(3)           | -3(3)           | -1(3)           |
| C(17) | 10(3)           | 18(3)           | 19(3)           | -4(3)           | 0(3)            | -5(3)           |
| C(18) | 23(4)           | 18(3)           | 25(4)           | -9(3)           | 1(3)            | -7(3)           |
| C(19) | 20(4)           | 26(4)           | 22(4)           | -9(3)           | 5(3)            | -11(3)          |
| C(20) | 14(4)           | 27(4)           | 26(4)           | -10(3)          | -4(3)           | -6(3)           |
| C(21) | 20(4)           | 20(4)           | 23(4)           | -8(3)           | -6(3)           | -2(3)           |
| C(22) | 39(5)           | 36(4)           | 25(4)           | -4(3)           | 5(3)            | -23(4)          |
| N(31) | 21(3)           | 11(3)           | 23(3)           | -9(2)           | -6(2)           | -6(2)           |
| N(32) | 22(3)           | 12(3)           | 18(3)           | -5(2)           | -2(2)           | -6(2)           |
| N(33) | 19(3)           | 23(3)           | 23(3)           | -11(2)          | 0(2)            | -7(3)           |
| O(31) | 23(3)           | 23(2)           | 20(2)           | -11(2)          | 2(2)            | -9(2)           |
| O(32) | 23(3)           | 20(2)           | 25(3)           | -12(2)          | 4(2)            | -12(2)          |
| C(31) | 20(4)           | 16(3)           | 24(4)           | -8(3)           | -3(3)           | -2(3)           |
| C(32) | 20(4)           | 15(3)           | 16(3)           | -3(3)           | -1(3)           | -7(3)           |
| C(33) | 18(4)           | 11(3)           | 20(3)           | -6(3)           | -7(3)           | 4(3)            |
| C(34) | 25(4)           | 19(3)           | 19(3)           | -3(3)           | -4(3)           | -9(3)           |
| C(35) | 23(4)           | 11(3)           | 21(3)           | -1(3)           | -3(3)           | -2(3)           |
| C(36) | 21(4)           | 12(3)           | 13(3)           | 0(3)            | -5(3)           | 4(3)            |

Supplementary Material (ESI) for Dalton Transactions  
This journal is (c) The Royal Society of Chemistry 2008

|       |       |       |       |        |       |        |
|-------|-------|-------|-------|--------|-------|--------|
| C(37) | 24(4) | 16(3) | 18(3) | -1(3)  | -8(3) | -4(3)  |
| C(38) | 39(4) | 14(3) | 22(4) | -3(3)  | -7(3) | 1(3)   |
| C(39) | 22(4) | 22(4) | 15(3) | -9(3)  | 3(3)  | -9(3)  |
| C(40) | 24(4) | 20(4) | 32(4) | -6(3)  | 4(3)  | -12(3) |
| C(41) | 38(5) | 25(4) | 27(4) | -13(3) | 12(3) | -17(4) |
| C(42) | 29(4) | 29(4) | 27(4) | -1(3)  | -1(3) | -8(3)  |
| N(51) | 24(3) | 12(3) | 20(3) | -5(2)  | -3(2) | -11(2) |
| N(52) | 19(3) | 12(3) | 23(3) | -7(2)  | 3(2)  | -6(2)  |
| N(53) | 19(3) | 14(3) | 20(3) | -8(2)  | -1(2) | -2(2)  |
| O(51) | 22(3) | 20(2) | 19(2) | -10(2) | 1(2)  | -5(2)  |
| O(52) | 37(3) | 19(2) | 28(3) | -11(2) | 3(2)  | -13(2) |
| C(51) | 9(3)  | 23(4) | 19(3) | -9(3)  | 0(3)  | -4(3)  |
| C(52) | 15(3) | 13(3) | 17(3) | -1(3)  | -4(3) | -4(3)  |
| C(53) | 19(4) | 17(3) | 15(3) | -1(3)  | -5(3) | -6(3)  |
| C(54) | 28(4) | 16(3) | 25(4) | -5(3)  | 1(3)  | -11(3) |
| C(55) | 31(4) | 19(3) | 17(3) | -9(3)  | 2(3)  | -11(3) |
| C(56) | 19(4) | 15(3) | 14(3) | 0(3)   | -1(3) | 1(3)   |
| C(57) | 17(4) | 14(3) | 24(4) | -1(3)  | -3(3) | -2(3)  |
| C(58) | 30(4) | 27(4) | 23(4) | -7(3)  | -5(3) | -11(3) |
| C(59) | 17(4) | 11(3) | 26(4) | -3(3)  | -3(3) | 5(3)   |
| C(60) | 19(4) | 32(4) | 26(4) | -14(3) | 3(3)  | -10(3) |
| C(61) | 16(4) | 32(4) | 25(4) | -13(3) | -4(3) | -2(3)  |
| C(62) | 31(4) | 34(4) | 22(4) | -6(3)  | 4(3)  | -15(4) |
| N(71) | 29(3) | 15(3) | 16(3) | -4(2)  | -6(2) | -8(3)  |
| N(72) | 30(4) | 23(3) | 22(3) | -10(3) | -2(3) | -7(3)  |
| N(73) | 24(3) | 28(3) | 15(3) | -8(2)  | -1(2) | -12(3) |
| O(71) | 24(3) | 18(2) | 21(2) | -9(2)  | -4(2) | -5(2)  |
| O(72) | 32(3) | 15(2) | 24(3) | -10(2) | 6(2)  | -11(2) |
| C(71) | 19(4) | 15(3) | 18(3) | -3(3)  | -4(3) | -4(3)  |
| C(72) | 21(4) | 11(3) | 13(3) | -1(3)  | -5(3) | 5(3)   |
| C(73) | 17(4) | 18(3) | 15(3) | -8(3)  | -4(3) | 1(3)   |
| C(74) | 28(4) | 11(3) | 26(4) | -3(3)  | -8(3) | -8(3)  |
| C(75) | 26(4) | 16(3) | 22(4) | -8(3)  | -9(3) | -3(3)  |
| C(76) | 23(4) | 13(3) | 17(3) | -2(3)  | -7(3) | 5(3)   |
| C(77) | 20(4) | 18(3) | 15(3) | -2(3)  | -3(3) | -5(3)  |
| C(78) | 26(4) | 17(4) | 31(4) | -4(3)  | -8(3) | 3(3)   |

Supplementary Material (ESI) for Dalton Transactions  
This journal is (c) The Royal Society of Chemistry 2008

|        |        |        |        |         |        |        |
|--------|--------|--------|--------|---------|--------|--------|
| C(79)  | 19(4)  | 25(4)  | 25(4)  | -12(3)  | -1(3)  | -8(3)  |
| C(80)  | 19(4)  | 31(4)  | 30(4)  | -18(3)  | 12(3)  | -9(3)  |
| C(81)  | 37(5)  | 27(4)  | 27(4)  | -15(3)  | 10(3)  | -19(4) |
| C(82)  | 34(4)  | 20(4)  | 29(4)  | 1(3)    | -9(3)  | -10(3) |
| P(101) | 18(1)  | 19(1)  | 23(1)  | -6(1)   | -3(1)  | -5(1)  |
| F(101) | 47(3)  | 27(2)  | 52(3)  | -14(2)  | 14(2)  | 0(2)   |
| F(102) | 36(3)  | 74(3)  | 31(2)  | -17(2)  | -7(2)  | -25(3) |
| F(103) | 54(3)  | 21(2)  | 49(3)  | -5(2)   | 9(2)   | -2(2)  |
| F(104) | 41(3)  | 53(3)  | 30(2)  | -2(2)   | -11(2) | -32(2) |
| F(105) | 27(2)  | 41(3)  | 24(2)  | 7(2)    | -5(2)  | -12(2) |
| F(106) | 21(2)  | 38(2)  | 33(2)  | -7(2)   | 1(2)   | -17(2) |
| P(201) | 23(1)  | 24(1)  | 33(1)  | -16(1)  | 1(1)   | -3(1)  |
| F(201) | 36(3)  | 52(3)  | 152(5) | -65(4)  | 23(3)  | -7(3)  |
| F(202) | 49(3)  | 40(3)  | 59(3)  | -27(2)  | 14(2)  | -29(2) |
| F(203) | 36(3)  | 33(3)  | 62(3)  | -19(2)  | 12(2)  | 0(2)   |
| F(204) | 40(3)  | 41(3)  | 73(3)  | -29(2)  | -3(2)  | -17(2) |
| F(205) | 80(4)  | 96(4)  | 26(3)  | -16(3)  | 12(2)  | -63(3) |
| F(206) | 79(4)  | 53(3)  | 49(3)  | 2(2)    | -32(3) | -7(3)  |
| P(301) | 26(1)  | 26(1)  | 32(1)  | -12(1)  | 6(1)   | -6(1)  |
| F(301) | 30(2)  | 40(3)  | 41(3)  | -23(2)  | 6(2)   | -7(2)  |
| F(302) | 31(3)  | 73(4)  | 82(4)  | -57(3)  | -6(2)  | -1(3)  |
| F(303) | 40(3)  | 62(3)  | 104(4) | -54(3)  | 33(3)  | -20(3) |
| F(304) | 42(3)  | 165(7) | 186(7) | -151(6) | 40(4)  | -51(4) |
| F(305) | 140(6) | 45(3)  | 70(4)  | 16(3)   | 52(4)  | -3(4)  |
| F(306) | 69(4)  | 63(4)  | 62(4)  | 14(3)   | -14(3) | 12(3)  |
| P(401) | 21(1)  | 22(1)  | 19(1)  | -7(1)   | -2(1)  | -7(1)  |
| F(401) | 25(2)  | 53(3)  | 20(2)  | 4(2)    | -9(2)  | -15(2) |
| F(402) | 37(3)  | 135(5) | 24(3)  | -12(3)  | 0(2)   | 23(3)  |
| F(403) | 21(2)  | 78(3)  | 21(2)  | 0(2)    | -7(2)  | -7(2)  |
| F(404) | 40(3)  | 105(4) | 28(3)  | -2(3)   | 5(2)   | 6(3)   |
| F(405) | 203(7) | 26(3)  | 70(4)  | 11(3)   | -58(4) | -58(4) |
| F(406) | 154(6) | 47(3)  | 54(3)  | -4(3)   | -30(3) | -61(4) |

---

Table 5. Hydrogen coordinates ( $\times 10^4$ ) and isotropic displacement parameters ( $\text{\AA}^2 \times 10^3$ ) for IL-bis(oxime)-Cu<sup>II</sup>, **4**.

|        | x     | y     | z     | U(eq) |
|--------|-------|-------|-------|-------|
| H(12)  | 9160  | 9830  | 4780  | 34    |
| H(11)  | 10804 | 8798  | 3748  | 21    |
| H(14)  | 8071  | 6516  | 4334  | 23    |
| H(15)  | 9627  | 5996  | 3521  | 24    |
| H(17)  | 11561 | 7761  | 3209  | 19    |
| H(18A) | 12669 | 6503  | 2824  | 25    |
| H(18B) | 11670 | 5965  | 2770  | 25    |
| H(19)  | 12930 | 7580  | 1544  | 26    |
| H(20)  | 9386  | 6942  | 1743  | 26    |
| H(21)  | 9384  | 8004  | 447   | 26    |
| H(22A) | 12691 | 8629  | 232   | 49    |
| H(22B) | 11129 | 9116  | 2     | 49    |
| H(22C) | 11869 | 8418  | -357  | 49    |
| H(32)  | 6179  | 7561  | 5255  | 31    |
| H(31)  | 4387  | 8709  | 6130  | 24    |
| H(34)  | 7422  | 10805 | 5770  | 25    |
| H(35)  | 5752  | 11424 | 6455  | 24    |
| H(37)  | 3581  | 9795  | 6614  | 24    |
| H(38A) | 3461  | 11657 | 6938  | 32    |
| H(38B) | 2469  | 11135 | 6846  | 32    |
| H(39)  | 5455  | 9934  | 8054  | 22    |
| H(40)  | 1564  | 11095 | 8287  | 30    |
| H(41)  | 2489  | 10134 | 9589  | 33    |
| H(42A) | 5178  | 8658  | 9562  | 45    |
| H(42B) | 4882  | 9183  | 10139 | 45    |
| H(42C) | 6136  | 9241  | 9547  | 45    |
| H(52)  | 1360  | 5077  | 5024  | 39    |
| H(51)  | -191  | 6085  | 6059  | 20    |
| H(54)  | 2720  | 8252  | 5630  | 27    |
| H(55)  | 1115  | 8812  | 6388  | 24    |

Supplementary Material (ESI) for Dalton Transactions  
This journal is (c) The Royal Society of Chemistry 2008

|        |       |      |       |    |
|--------|-------|------|-------|----|
| H(57)  | -950  | 7119 | 6622  | 24 |
| H(58A) | -1110 | 8952 | 6992  | 31 |
| H(58B) | -2051 | 8366 | 6986  | 31 |
| H(59)  | -2474 | 7565 | 8361  | 24 |
| H(60)  | 1281  | 7922 | 8040  | 29 |
| H(61)  | 1118  | 7078 | 9419  | 28 |
| H(62A) | -2428 | 6837 | 9832  | 42 |
| H(62B) | -1062 | 6698 | 10306 | 42 |
| H(62C) | -1149 | 6084 | 9861  | 42 |
| H(72)  | 4503  | 7257 | 4688  | 33 |
| H(71)  | 6212  | 6230 | 3687  | 21 |
| H(74)  | 3299  | 4082 | 3989  | 26 |
| H(75)  | 4864  | 3594 | 3176  | 25 |
| H(77)  | 6894  | 5281 | 3036  | 22 |
| H(78A) | 7935  | 4177 | 2493  | 32 |
| H(78B) | 7036  | 3582 | 2451  | 32 |
| H(79)  | 4471  | 5144 | 1769  | 26 |
| H(80)  | 8216  | 4595 | 893   | 30 |
| H(81)  | 6654  | 5618 | -179  | 33 |
| H(82A) | 3100  | 6029 | 504   | 44 |
| H(82B) | 3922  | 6204 | -300  | 44 |
| H(82C) | 3943  | 6709 | 270   | 44 |

---

Table 6. Torsion angles [°] for IL-bis(oxime)-Cu<sup>II</sup>, **4**.

---

|                         |           |
|-------------------------|-----------|
| O(31)-Cu(1)-N(11)-C(11) | 179.0(5)  |
| O(11)-Cu(1)-N(11)-C(11) | 0.8(5)    |
| N(31)-Cu(1)-N(11)-C(11) | -93(3)    |
| O(31)-Cu(1)-N(11)-O(12) | -3.0(4)   |
| O(11)-Cu(1)-N(11)-O(12) | 178.8(4)  |
| N(31)-Cu(1)-N(11)-O(12) | 85(3)     |
| O(31)-Cu(1)-O(11)-C(13) | -86(6)    |
| N(31)-Cu(1)-O(11)-C(13) | 175.8(5)  |
| N(11)-Cu(1)-O(11)-C(13) | -0.6(5)   |
| O(12)-N(11)-C(11)-C(12) | -179.4(5) |
| Cu(1)-N(11)-C(11)-C(12) | -1.3(9)   |
| N(11)-C(11)-C(12)-C(17) | -180.0(6) |
| N(11)-C(11)-C(12)-C(13) | 1.4(9)    |
| Cu(1)-O(11)-C(13)-C(14) | -178.6(4) |
| Cu(1)-O(11)-C(13)-C(12) | 0.9(8)    |
| C(17)-C(12)-C(13)-O(11) | -179.8(5) |
| C(11)-C(12)-C(13)-O(11) | -1.2(9)   |
| C(17)-C(12)-C(13)-C(14) | -0.3(8)   |
| C(11)-C(12)-C(13)-C(14) | 178.3(6)  |
| O(11)-C(13)-C(14)-C(15) | 179.1(5)  |
| C(12)-C(13)-C(14)-C(15) | -0.4(9)   |
| C(13)-C(14)-C(15)-C(16) | 0.6(9)    |
| C(14)-C(15)-C(16)-C(17) | -0.1(9)   |
| C(14)-C(15)-C(16)-C(18) | -176.0(5) |
| C(15)-C(16)-C(17)-C(12) | -0.7(9)   |
| C(18)-C(16)-C(17)-C(12) | 175.3(6)  |
| C(11)-C(12)-C(17)-C(16) | -177.9(5) |
| C(13)-C(12)-C(17)-C(16) | 0.8(9)    |
| C(19)-N(12)-C(18)-C(16) | 111.8(7)  |
| C(20)-N(12)-C(18)-C(16) | -63.1(7)  |
| C(17)-C(16)-C(18)-N(12) | -73.6(7)  |
| C(15)-C(16)-C(18)-N(12) | 102.3(6)  |
| C(21)-N(13)-C(19)-N(12) | 1.1(7)    |
| C(22)-N(13)-C(19)-N(12) | 179.6(6)  |

Supplementary Material (ESI) for Dalton Transactions  
This journal is (c) The Royal Society of Chemistry 2008

|                         |           |
|-------------------------|-----------|
| C(20)-N(12)-C(19)-N(13) | -0.7(7)   |
| C(18)-N(12)-C(19)-N(13) | -176.4(5) |
| C(19)-N(12)-C(20)-C(21) | 0.0(7)    |
| C(18)-N(12)-C(20)-C(21) | 175.7(5)  |
| N(12)-C(20)-C(21)-N(13) | 0.6(7)    |
| C(19)-N(13)-C(21)-C(20) | -1.1(7)   |
| C(22)-N(13)-C(21)-C(20) | -179.5(6) |
| O(31)-Cu(1)-N(31)-C(31) | 5.4(5)    |
| O(11)-Cu(1)-N(31)-C(31) | -176.4(5) |
| N(11)-Cu(1)-N(31)-C(31) | -83(3)    |
| O(31)-Cu(1)-N(31)-O(32) | -176.8(4) |
| O(11)-Cu(1)-N(31)-O(32) | 1.5(4)    |
| N(11)-Cu(1)-N(31)-O(32) | 95(3)     |
| O(11)-Cu(1)-O(31)-C(33) | -102(6)   |
| N(31)-Cu(1)-O(31)-C(33) | -4.0(5)   |
| N(11)-Cu(1)-O(31)-C(33) | 172.3(5)  |
| O(32)-N(31)-C(31)-C(32) | 178.4(5)  |
| Cu(1)-N(31)-C(31)-C(32) | -3.6(9)   |
| N(31)-C(31)-C(32)-C(37) | -179.9(6) |
| N(31)-C(31)-C(32)-C(33) | -1.4(9)   |
| Cu(1)-O(31)-C(33)-C(34) | -179.7(4) |
| Cu(1)-O(31)-C(33)-C(32) | 1.0(8)    |
| C(37)-C(32)-C(33)-O(31) | -178.7(5) |
| C(31)-C(32)-C(33)-O(31) | 2.8(9)    |
| C(37)-C(32)-C(33)-C(34) | 2.0(8)    |
| C(31)-C(32)-C(33)-C(34) | -176.5(6) |
| O(31)-C(33)-C(34)-C(35) | 179.2(5)  |
| C(32)-C(33)-C(34)-C(35) | -1.5(9)   |
| C(33)-C(34)-C(35)-C(36) | -1.2(9)   |
| C(34)-C(35)-C(36)-C(37) | 3.2(9)    |
| C(34)-C(35)-C(36)-C(38) | 178.7(5)  |
| C(35)-C(36)-C(37)-C(32) | -2.6(8)   |
| C(38)-C(36)-C(37)-C(32) | -178.2(5) |
| C(33)-C(32)-C(37)-C(36) | 0.1(9)    |
| C(31)-C(32)-C(37)-C(36) | 178.7(5)  |
| C(39)-N(32)-C(38)-C(36) | 19.3(9)   |

Supplementary Material (ESI) for Dalton Transactions  
This journal is (c) The Royal Society of Chemistry 2008

|                         |           |
|-------------------------|-----------|
| C(40)-N(32)-C(38)-C(36) | -160.9(6) |
| C(35)-C(36)-C(38)-N(32) | -98.8(7)  |
| C(37)-C(36)-C(38)-N(32) | 76.6(7)   |
| C(41)-N(33)-C(39)-N(32) | 0.9(7)    |
| C(42)-N(33)-C(39)-N(32) | 172.7(5)  |
| C(40)-N(32)-C(39)-N(33) | 0.1(7)    |
| C(38)-N(32)-C(39)-N(33) | 179.9(5)  |
| C(39)-N(32)-C(40)-C(41) | -1.0(7)   |
| C(38)-N(32)-C(40)-C(41) | 179.1(5)  |
| N(32)-C(40)-C(41)-N(33) | 1.6(7)    |
| C(39)-N(33)-C(41)-C(40) | -1.6(7)   |
| C(42)-N(33)-C(41)-C(40) | -173.0(6) |
| O(51)-Cu(2)-N(51)-C(51) | 2.2(5)    |
| O(71)-Cu(2)-N(51)-C(51) | -175.4(5) |
| N(71)-Cu(2)-N(51)-C(51) | 58(6)     |
| O(51)-Cu(2)-N(51)-O(52) | -178.7(4) |
| O(71)-Cu(2)-N(51)-O(52) | 3.7(4)    |
| N(71)-Cu(2)-N(51)-O(52) | -123(6)   |
| O(71)-Cu(2)-O(51)-C(53) | 103(4)    |
| N(51)-Cu(2)-O(51)-C(53) | 0.7(5)    |
| N(71)-Cu(2)-O(51)-C(53) | -177.6(5) |
| O(52)-N(51)-C(51)-C(52) | 178.1(5)  |
| Cu(2)-N(51)-C(51)-C(52) | -2.8(9)   |
| N(51)-C(51)-C(52)-C(53) | 0.1(9)    |
| N(51)-C(51)-C(52)-C(57) | -179.3(6) |
| Cu(2)-O(51)-C(53)-C(54) | 177.4(4)  |
| Cu(2)-O(51)-C(53)-C(52) | -3.0(8)   |
| C(57)-C(52)-C(53)-O(51) | -177.8(5) |
| C(51)-C(52)-C(53)-O(51) | 2.8(9)    |
| C(57)-C(52)-C(53)-C(54) | 1.9(8)    |
| C(51)-C(52)-C(53)-C(54) | -177.6(5) |
| O(51)-C(53)-C(54)-C(55) | 177.9(6)  |
| C(52)-C(53)-C(54)-C(55) | -1.8(9)   |
| C(53)-C(54)-C(55)-C(56) | 0.2(10)   |
| C(54)-C(55)-C(56)-C(57) | 1.2(9)    |
| C(54)-C(55)-C(56)-C(58) | 177.7(6)  |



Supplementary Material (ESI) for Dalton Transactions  
This journal is (c) The Royal Society of Chemistry 2008

|                         |           |
|-------------------------|-----------|
| C(55)-C(56)-C(57)-C(52) | -1.0(9)   |
| C(58)-C(56)-C(57)-C(52) | -177.5(5) |
| C(53)-C(52)-C(57)-C(56) | -0.5(9)   |
| C(51)-C(52)-C(57)-C(56) | 178.9(5)  |
| C(59)-N(52)-C(58)-C(56) | -123.4(6) |
| C(60)-N(52)-C(58)-C(56) | 54.8(8)   |
| C(57)-C(56)-C(58)-N(52) | 80.5(7)   |
| C(55)-C(56)-C(58)-N(52) | -95.9(7)  |
| C(60)-N(52)-C(59)-N(53) | 0.0(7)    |
| C(58)-N(52)-C(59)-N(53) | 178.4(5)  |
| C(61)-N(53)-C(59)-N(52) | 0.3(7)    |
| C(62)-N(53)-C(59)-N(52) | -176.2(5) |
| C(59)-N(52)-C(60)-C(61) | -0.2(7)   |
| C(58)-N(52)-C(60)-C(61) | -178.7(5) |
| N(52)-C(60)-C(61)-N(53) | 0.4(7)    |
| C(59)-N(53)-C(61)-C(60) | -0.4(7)   |
| C(62)-N(53)-C(61)-C(60) | 175.9(6)  |
| O(51)-Cu(2)-N(71)-C(71) | -179.1(5) |
| O(71)-Cu(2)-N(71)-C(71) | -1.6(5)   |
| N(51)-Cu(2)-N(71)-C(71) | 125(6)    |
| O(51)-Cu(2)-N(71)-O(72) | 3.8(4)    |
| O(71)-Cu(2)-N(71)-O(72) | -178.7(4) |
| N(51)-Cu(2)-N(71)-O(72) | -52(6)    |
| O(51)-Cu(2)-O(71)-C(73) | 79(4)     |
| N(51)-Cu(2)-O(71)-C(73) | -178.2(5) |
| N(71)-Cu(2)-O(71)-C(73) | 0.1(5)    |
| O(72)-N(71)-C(71)-C(72) | 179.9(5)  |
| Cu(2)-N(71)-C(71)-C(72) | 2.7(9)    |
| N(71)-C(71)-C(72)-C(77) | 177.0(6)  |
| N(71)-C(71)-C(72)-C(73) | -2.2(9)   |
| Cu(2)-O(71)-C(73)-C(74) | -178.4(4) |
| Cu(2)-O(71)-C(73)-C(72) | 0.1(8)    |
| C(77)-C(72)-C(73)-O(71) | -178.5(5) |
| C(71)-C(72)-C(73)-O(71) | 0.7(9)    |
| C(77)-C(72)-C(73)-C(74) | 0.1(8)    |
| C(71)-C(72)-C(73)-C(74) | 179.3(5)  |

Supplementary Material (ESI) for Dalton Transactions  
This journal is (c) The Royal Society of Chemistry 2008

|                         |           |
|-------------------------|-----------|
| O(71)-C(73)-C(74)-C(75) | 178.5(6)  |
| C(72)-C(73)-C(74)-C(75) | -0.2(9)   |
| C(73)-C(74)-C(75)-C(76) | -0.2(9)   |
| C(74)-C(75)-C(76)-C(77) | 0.8(9)    |
| C(74)-C(75)-C(76)-C(78) | -173.1(6) |
| C(75)-C(76)-C(77)-C(72) | -0.9(9)   |
| C(78)-C(76)-C(77)-C(72) | 173.1(5)  |
| C(73)-C(72)-C(77)-C(76) | 0.5(9)    |
| C(71)-C(72)-C(77)-C(76) | -178.8(5) |
| C(79)-N(72)-C(78)-C(76) | -23.3(8)  |
| C(80)-N(72)-C(78)-C(76) | 159.1(6)  |
| C(77)-C(76)-C(78)-N(72) | -80.0(7)  |
| C(75)-C(76)-C(78)-N(72) | 93.7(7)   |
| C(80)-N(72)-C(79)-N(73) | -1.7(7)   |
| C(78)-N(72)-C(79)-N(73) | -179.6(5) |
| C(81)-N(73)-C(79)-N(72) | 0.3(7)    |
| C(82)-N(73)-C(79)-N(72) | -173.0(5) |
| C(79)-N(72)-C(80)-C(81) | 2.4(7)    |
| C(78)-N(72)-C(80)-C(81) | -179.7(5) |
| C(79)-N(73)-C(81)-C(80) | 1.2(7)    |
| C(82)-N(73)-C(81)-C(80) | 174.3(6)  |
| N(72)-C(80)-C(81)-N(73) | -2.2(7)   |

---

Symmetry transformations used to generate equivalent atoms:

## Crystallographic data for the structure IL-salen-Cu<sup>II</sup>, 5.

**Table 1.** Crystal data and structure refinement for IL-salen-Cu<sup>II</sup>, 5.

**Table 2.** Atomic coordinates and equivalent isotropic displacement parameters for IL-salen-Cu<sup>II</sup>, 5.

**Table 3.** Bond lengths and angles for the structure IL-salen-Cu<sup>II</sup>, 5.

**Table 4.** Anisotropic displacement parameters for the structure IL-salen-Cu<sup>II</sup>, 5.

**Table 5.** Hydrogen coordinates and isotropic displacement parameters for the structure IL-salen-Cu<sup>II</sup>, 5.

**Table 6.** Torsion angles for the structure IL-salen-Cu<sup>II</sup>, 5.

**Table 1. Crystal data and structure refinement for *of* IL-salen-Cu<sup>II</sup>, 5.**

|                                   |                                                                                                 |                  |
|-----------------------------------|-------------------------------------------------------------------------------------------------|------------------|
| Identification code               | rs0213                                                                                          |                  |
| Empirical formula                 | C <sub>26</sub> H <sub>28</sub> Cu F <sub>12</sub> N <sub>6</sub> O <sub>4</sub> P <sub>2</sub> |                  |
| Formula weight                    | 842.02                                                                                          |                  |
| Temperature                       | 100(2) K                                                                                        |                  |
| Wavelength                        | 0.71073 Å                                                                                       |                  |
| Crystal system                    | Monoclinic                                                                                      |                  |
| Space group                       | P2(1)/c                                                                                         |                  |
| Unit cell dimensions              | a = 8.492(4) Å                                                                                  | α = 90°.         |
|                                   | b = 10.988(5) Å                                                                                 | β = 91.442(12)°. |
|                                   | c = 35.208(17) Å                                                                                | γ = 90°.         |
| Volume                            | 3284(3) Å <sup>3</sup>                                                                          |                  |
| Z                                 | 4                                                                                               |                  |
| Density (calculated)              | 1.703 Mg/m <sup>3</sup>                                                                         |                  |
| Absorption coefficient            | 0.875 mm <sup>-1</sup>                                                                          |                  |
| F(000)                            | 1700                                                                                            |                  |
| Crystal size                      | 0.35 x 0.20 x 0.10 mm <sup>3</sup>                                                              |                  |
| Theta range for data collection   | 1.16 to 25.23°.                                                                                 |                  |
| Index ranges                      | -7 ≤ h ≤ 10, -10 ≤ k ≤ 12, -42 ≤ l ≤ 36                                                         |                  |
| Reflections collected             | 12988                                                                                           |                  |
| Independent reflections           | 5754 [R(int) = 0.1029]                                                                          |                  |
| Completeness to theta = 25.23°    | 96.9 %                                                                                          |                  |
| Absorption correction             | Semi-empirical from equivalents                                                                 |                  |
| Max. and min. transmission        | 1.000 and 0.480                                                                                 |                  |
| Refinement method                 | Full-matrix least-squares on F <sup>2</sup>                                                     |                  |
| Data / restraints / parameters    | 5754 / 0 / 462                                                                                  |                  |
| Goodness-of-fit on F <sup>2</sup> | 1.106                                                                                           |                  |
| Final R indices [I > 2σ(I)]       | R1 = 0.1151, wR2 = 0.2477                                                                       |                  |
| R indices (all data)              | R1 = 0.2015, wR2 = 0.2935                                                                       |                  |
| Largest diff. peak and hole       | 0.896 and -0.555 e.Å <sup>-3</sup>                                                              |                  |

Table 2. Atomic coordinates ( $\times 10^4$ ) and equivalent isotropic displacement parameters ( $\text{\AA}^2 \times 10^3$ ) for *of* **IL-salen-Cu<sup>II</sup>**, **5**. U(eq) is defined as one third of the trace of the orthogonalized  $U^{ij}$  tensor.

|       | x         | y         | z       | U(eq) |
|-------|-----------|-----------|---------|-------|
| Cu(1) | 7313(2)   | 5018(1)   | 5051(1) | 37(1) |
| N(11) | 8405(12)  | 5624(10)  | 4615(3) | 42(3) |
| N(12) | 11527(11) | 678(11)   | 3630(3) | 45(3) |
| N(13) | 10578(11) | -871(10)  | 3350(3) | 46(3) |
| N(14) | 6330(11)  | 6589(9)   | 5051(2) | 39(2) |
| N(15) | 3167(11)  | 7282(9)   | 6890(3) | 39(2) |
| N(16) | 4678(12)  | 7786(10)  | 7358(3) | 49(3) |
| O(11) | 8076(9)   | 3390(7)   | 4988(2) | 39(2) |
| O(12) | 6473(9)   | 4552(7)   | 5528(2) | 38(2) |
| C(11) | 8175(16)  | 6958(12)  | 4547(3) | 55(4) |
| C(12) | 9352(14)  | 4990(13)  | 4402(3) | 48(3) |
| C(13) | 9688(14)  | 3709(12)  | 4440(3) | 44(3) |
| C(14) | 10694(14) | 3209(15)  | 4180(3) | 51(4) |
| C(15) | 11084(13) | 1967(14)  | 4187(3) | 45(3) |
| C(16) | 10371(14) | 1254(13)  | 4456(3) | 47(3) |
| C(17) | 9338(15)  | 1727(13)  | 4710(3) | 47(3) |
| C(18) | 8994(13)  | 2961(12)  | 4720(3) | 38(3) |
| C(19) | 12254(15) | 1453(14)  | 3932(3) | 59(4) |
| C(20) | 11290(15) | -475(14)  | 3669(4) | 51(4) |
| C(21) | 10977(14) | 1069(12)  | 3273(3) | 40(3) |
| C(22) | 10401(14) | 68(14)    | 3097(4) | 50(3) |
| C(23) | 10170(20) | -2159(13) | 3257(5) | 99(7) |
| C(24) | 6591(14)  | 7266(11)  | 4696(3) | 41(3) |
| C(25) | 5457(14)  | 7030(11)  | 5309(3) | 40(3) |
| C(26) | 5024(12)  | 6405(10)  | 5656(3) | 29(3) |
| C(27) | 4071(12)  | 7047(11)  | 5905(3) | 40(3) |
| C(28) | 3564(13)  | 6531(12)  | 6237(3) | 41(3) |
| C(29) | 4064(14)  | 5312(11)  | 6314(3) | 39(3) |
| C(30) | 5024(14)  | 4680(10)  | 6078(3) | 37(3) |
| C(31) | 5531(13)  | 5239(11)  | 5738(3) | 36(3) |

Supplementary Material (ESI) for Dalton Transactions  
This journal is (c) The Royal Society of Chemistry 2008

|       |          |          |         |         |
|-------|----------|----------|---------|---------|
| C(32) | 2515(12) | 7170(12) | 6497(3) | 39(3)   |
| C(33) | 4353(15) | 7965(12) | 6993(4) | 52(4)   |
| C(34) | 2678(16) | 6625(14) | 7202(4) | 61(4)   |
| C(35) | 3643(17) | 6975(15) | 7491(4) | 63(4)   |
| C(36) | 5965(18) | 8366(15) | 7588(4) | 85(6)   |
| P(41) | 8081(4)  | 9662(3)  | 2044(1) | 39(1)   |
| F(41) | 9286(12) | 9645(9)  | 1723(3) | 108(4)  |
| F(42) | 9149(14) | 10593(8) | 2273(3) | 117(4)  |
| F(43) | 6879(14) | 9647(9)  | 2370(3) | 120(4)  |
| F(44) | 7090(12) | 8699(7)  | 1816(3) | 104(4)  |
| F(45) | 7185(9)  | 10767(6) | 1840(2) | 59(2)   |
| F(46) | 8976(9)  | 8567(7)  | 2256(2) | 64(2)   |
| P(51) | 5924(4)  | 9007(3)  | 3590(1) | 46(1)   |
| F(51) | 7339(14) | 8999(19) | 3836(3) | 203(9)  |
| F(52) | 5404(12) | 10298(7) | 3708(3) | 111(4)  |
| F(53) | 4445(12) | 9012(16) | 3325(3) | 179(7)  |
| F(54) | 6371(16) | 7711(9)  | 3459(5) | 188(8)  |
| F(55) | 6891(11) | 9475(8)  | 3261(3) | 92(3)   |
| F(56) | 4843(16) | 8502(11) | 3891(4) | 191(8)  |
| O(1S) | 7645(12) | 1971(11) | 5601(3) | 91(4)   |
| O(2S) | 4210(40) | 9942(18) | 4640(6) | 265(13) |

---

Table 3. Bond lengths [Å] and angles [°] for **IL-salen-Cu<sup>II</sup>, 5**.

---

|              |           |
|--------------|-----------|
| Cu(1)-O(12)  | 1.911(7)  |
| Cu(1)-O(11)  | 1.917(8)  |
| Cu(1)-N(14)  | 1.918(11) |
| Cu(1)-N(11)  | 1.931(10) |
| N(11)-C(12)  | 1.312(16) |
| N(11)-C(11)  | 1.497(16) |
| N(12)-C(20)  | 1.291(16) |
| N(12)-C(21)  | 1.396(13) |
| N(12)-C(19)  | 1.485(14) |
| N(13)-C(20)  | 1.336(16) |
| N(13)-C(22)  | 1.369(16) |
| N(13)-C(23)  | 1.490(17) |
| N(14)-C(25)  | 1.283(14) |
| N(14)-C(24)  | 1.475(13) |
| N(15)-C(33)  | 1.300(15) |
| N(15)-C(34)  | 1.388(15) |
| N(15)-C(32)  | 1.482(13) |
| N(16)-C(33)  | 1.322(15) |
| N(16)-C(35)  | 1.344(17) |
| N(16)-C(36)  | 1.488(16) |
| O(11)-C(18)  | 1.325(13) |
| O(12)-C(31)  | 1.339(13) |
| C(11)-C(24)  | 1.495(17) |
| C(11)-H(11A) | 0.9900    |
| C(11)-H(11B) | 0.9900    |
| C(12)-C(13)  | 1.442(18) |
| C(12)-H(12)  | 0.9500    |
| C(13)-C(14)  | 1.381(17) |
| C(13)-C(18)  | 1.423(16) |
| C(14)-C(15)  | 1.404(18) |
| C(14)-H(14)  | 0.9500    |
| C(15)-C(16)  | 1.382(17) |
| C(15)-C(19)  | 1.468(16) |
| C(16)-C(17)  | 1.371(16) |

Supplementary Material (ESI) for Dalton Transactions  
This journal is (c) The Royal Society of Chemistry 2008

|              |           |
|--------------|-----------|
| C(16)-H(16)  | 0.9500    |
| C(17)-C(18)  | 1.388(17) |
| C(17)-H(17)  | 0.9500    |
| C(19)-H(19A) | 0.9900    |
| C(19)-H(19B) | 0.9900    |
| C(20)-H(20)  | 0.9500    |
| C(21)-C(22)  | 1.350(17) |
| C(21)-H(21)  | 0.9500    |
| C(22)-H(22)  | 0.9500    |
| C(23)-H(23A) | 0.9800    |
| C(23)-H(23B) | 0.9800    |
| C(23)-H(23C) | 0.9800    |
| C(24)-H(24A) | 0.9900    |
| C(24)-H(24B) | 0.9900    |
| C(25)-C(26)  | 1.456(15) |
| C(25)-H(25)  | 0.9500    |
| C(26)-C(31)  | 1.381(15) |
| C(26)-C(27)  | 1.400(15) |
| C(27)-C(28)  | 1.377(15) |
| C(27)-H(27)  | 0.9500    |
| C(28)-C(29)  | 1.429(17) |
| C(28)-C(32)  | 1.471(15) |
| C(29)-C(30)  | 1.369(16) |
| C(29)-H(29)  | 0.9500    |
| C(30)-C(31)  | 1.420(15) |
| C(30)-H(30)  | 0.9500    |
| C(32)-H(32A) | 0.9900    |
| C(32)-H(32B) | 0.9900    |
| C(33)-H(33)  | 0.9500    |
| C(34)-C(35)  | 1.346(18) |
| C(34)-H(34)  | 0.9500    |
| C(35)-H(35)  | 0.9500    |
| C(36)-H(36A) | 0.9800    |
| C(36)-H(36B) | 0.9800    |
| C(36)-H(36C) | 0.9800    |
| P(41)-F(41)  | 1.543(9)  |



Supplementary Material (ESI) for Dalton Transactions  
This journal is (c) The Royal Society of Chemistry 2008

|             |           |
|-------------|-----------|
| P(41)-F(43) | 1.556(9)  |
| P(41)-F(44) | 1.562(8)  |
| P(41)-F(42) | 1.577(8)  |
| P(41)-F(45) | 1.594(7)  |
| P(41)-F(46) | 1.599(7)  |
| P(51)-F(51) | 1.462(11) |
| P(51)-F(56) | 1.524(9)  |
| P(51)-F(55) | 1.527(8)  |
| P(51)-F(52) | 1.546(9)  |
| P(51)-F(53) | 1.547(11) |
| P(51)-F(54) | 1.548(11) |

|                   |           |
|-------------------|-----------|
| O(12)-Cu(1)-O(11) | 89.2(3)   |
| O(12)-Cu(1)-N(14) | 94.0(4)   |
| O(11)-Cu(1)-N(14) | 171.3(3)  |
| O(12)-Cu(1)-N(11) | 171.1(3)  |
| O(11)-Cu(1)-N(11) | 93.4(4)   |
| N(14)-Cu(1)-N(11) | 84.7(4)   |
| C(12)-N(11)-C(11) | 120.5(11) |
| C(12)-N(11)-Cu(1) | 125.7(9)  |
| C(11)-N(11)-Cu(1) | 113.6(9)  |
| C(20)-N(12)-C(21) | 110.3(11) |
| C(20)-N(12)-C(19) | 123.4(12) |
| C(21)-N(12)-C(19) | 126.3(12) |
| C(20)-N(13)-C(22) | 110.0(11) |
| C(20)-N(13)-C(23) | 126.2(14) |
| C(22)-N(13)-C(23) | 123.5(13) |
| C(25)-N(14)-C(24) | 120.8(11) |
| C(25)-N(14)-Cu(1) | 126.8(8)  |
| C(24)-N(14)-Cu(1) | 112.3(8)  |
| C(33)-N(15)-C(34) | 108.9(11) |
| C(33)-N(15)-C(32) | 125.3(11) |
| C(34)-N(15)-C(32) | 125.7(11) |
| C(33)-N(16)-C(35) | 108.4(11) |
| C(33)-N(16)-C(36) | 126.8(13) |
| C(35)-N(16)-C(36) | 124.9(13) |

Supplementary Material (ESI) for Dalton Transactions  
This journal is (c) The Royal Society of Chemistry 2008

|                     |           |
|---------------------|-----------|
| C(18)-O(11)-Cu(1)   | 128.4(7)  |
| C(31)-O(12)-Cu(1)   | 125.3(7)  |
| C(24)-C(11)-N(11)   | 106.3(10) |
| C(24)-C(11)-H(11A)  | 110.5     |
| N(11)-C(11)-H(11A)  | 110.5     |
| C(24)-C(11)-H(11B)  | 110.5     |
| N(11)-C(11)-H(11B)  | 110.5     |
| H(11A)-C(11)-H(11B) | 108.7     |
| N(11)-C(12)-C(13)   | 126.0(11) |
| N(11)-C(12)-H(12)   | 117.0     |
| C(13)-C(12)-H(12)   | 117.0     |
| C(14)-C(13)-C(18)   | 120.2(13) |
| C(14)-C(13)-C(12)   | 116.9(12) |
| C(18)-C(13)-C(12)   | 122.9(12) |
| C(13)-C(14)-C(15)   | 121.7(12) |
| C(13)-C(14)-H(14)   | 119.1     |
| C(15)-C(14)-H(14)   | 119.1     |
| C(16)-C(15)-C(14)   | 117.1(12) |
| C(16)-C(15)-C(19)   | 121.0(14) |
| C(14)-C(15)-C(19)   | 121.9(13) |
| C(17)-C(16)-C(15)   | 122.1(14) |
| C(17)-C(16)-H(16)   | 118.9     |
| C(15)-C(16)-H(16)   | 118.9     |
| C(16)-C(17)-C(18)   | 121.7(12) |
| C(16)-C(17)-H(17)   | 119.2     |
| C(18)-C(17)-H(17)   | 119.2     |
| O(11)-C(18)-C(17)   | 119.6(11) |
| O(11)-C(18)-C(13)   | 123.2(12) |
| C(17)-C(18)-C(13)   | 117.1(12) |
| C(15)-C(19)-N(12)   | 112.5(10) |
| C(15)-C(19)-H(19A)  | 109.1     |
| N(12)-C(19)-H(19A)  | 109.1     |
| C(15)-C(19)-H(19B)  | 109.1     |
| N(12)-C(19)-H(19B)  | 109.1     |
| H(19A)-C(19)-H(19B) | 107.8     |
| N(12)-C(20)-N(13)   | 107.4(13) |

Supplementary Material (ESI) for Dalton Transactions  
This journal is (c) The Royal Society of Chemistry 2008

|                     |           |
|---------------------|-----------|
| N(12)-C(20)-H(20)   | 126.3     |
| N(13)-C(20)-H(20)   | 126.3     |
| C(22)-C(21)-N(12)   | 105.9(11) |
| C(22)-C(21)-H(21)   | 127.1     |
| N(12)-C(21)-H(21)   | 127.1     |
| C(21)-C(22)-N(13)   | 106.3(11) |
| C(21)-C(22)-H(22)   | 126.8     |
| N(13)-C(22)-H(22)   | 126.8     |
| N(13)-C(23)-H(23A)  | 109.5     |
| N(13)-C(23)-H(23B)  | 109.5     |
| H(23A)-C(23)-H(23B) | 109.5     |
| N(13)-C(23)-H(23C)  | 109.5     |
| H(23A)-C(23)-H(23C) | 109.5     |
| H(23B)-C(23)-H(23C) | 109.5     |
| N(14)-C(24)-C(11)   | 109.8(10) |
| N(14)-C(24)-H(24A)  | 109.7     |
| C(11)-C(24)-H(24A)  | 109.7     |
| N(14)-C(24)-H(24B)  | 109.7     |
| C(11)-C(24)-H(24B)  | 109.7     |
| H(24A)-C(24)-H(24B) | 108.2     |
| N(14)-C(25)-C(26)   | 125.4(11) |
| N(14)-C(25)-H(25)   | 117.3     |
| C(26)-C(25)-H(25)   | 117.3     |
| C(31)-C(26)-C(27)   | 121.2(10) |
| C(31)-C(26)-C(25)   | 122.0(11) |
| C(27)-C(26)-C(25)   | 116.8(11) |
| C(28)-C(27)-C(26)   | 121.5(11) |
| C(28)-C(27)-H(27)   | 119.3     |
| C(26)-C(27)-H(27)   | 119.3     |
| C(27)-C(28)-C(29)   | 116.7(11) |
| C(27)-C(28)-C(32)   | 122.5(12) |
| C(29)-C(28)-C(32)   | 120.7(11) |
| C(30)-C(29)-C(28)   | 122.6(10) |
| C(30)-C(29)-H(29)   | 118.7     |
| C(28)-C(29)-H(29)   | 118.7     |
| C(29)-C(30)-C(31)   | 119.3(11) |

Supplementary Material (ESI) for Dalton Transactions  
This journal is (c) The Royal Society of Chemistry 2008

|                     |           |
|---------------------|-----------|
| C(29)-C(30)-H(30)   | 120.3     |
| C(31)-C(30)-H(30)   | 120.3     |
| O(12)-C(31)-C(26)   | 126.5(10) |
| O(12)-C(31)-C(30)   | 114.9(11) |
| C(26)-C(31)-C(30)   | 118.7(11) |
| C(28)-C(32)-N(15)   | 113.7(9)  |
| C(28)-C(32)-H(32A)  | 108.8     |
| N(15)-C(32)-H(32A)  | 108.8     |
| C(28)-C(32)-H(32B)  | 108.8     |
| N(15)-C(32)-H(32B)  | 108.8     |
| H(32A)-C(32)-H(32B) | 107.7     |
| N(15)-C(33)-N(16)   | 109.1(13) |
| N(15)-C(33)-H(33)   | 125.5     |
| N(16)-C(33)-H(33)   | 125.5     |
| C(35)-C(34)-N(15)   | 105.1(13) |
| C(35)-C(34)-H(34)   | 127.4     |
| N(15)-C(34)-H(34)   | 127.4     |
| N(16)-C(35)-C(34)   | 108.5(13) |
| N(16)-C(35)-H(35)   | 125.8     |
| C(34)-C(35)-H(35)   | 125.8     |
| N(16)-C(36)-H(36A)  | 109.5     |
| N(16)-C(36)-H(36B)  | 109.5     |
| H(36A)-C(36)-H(36B) | 109.5     |
| N(16)-C(36)-H(36C)  | 109.5     |
| H(36A)-C(36)-H(36C) | 109.5     |
| H(36B)-C(36)-H(36C) | 109.5     |
| F(41)-P(41)-F(43)   | 178.6(5)  |
| F(41)-P(41)-F(44)   | 88.5(6)   |
| F(43)-P(41)-F(44)   | 91.0(7)   |
| F(41)-P(41)-F(42)   | 89.9(7)   |
| F(43)-P(41)-F(42)   | 90.5(7)   |
| F(44)-P(41)-F(42)   | 177.3(6)  |
| F(41)-P(41)-F(45)   | 89.9(5)   |
| F(43)-P(41)-F(45)   | 91.5(5)   |
| F(44)-P(41)-F(45)   | 92.3(4)   |
| F(42)-P(41)-F(45)   | 89.9(4)   |

Supplementary Material (ESI) for Dalton Transactions  
This journal is (c) The Royal Society of Chemistry 2008

|                   |          |
|-------------------|----------|
| F(41)-P(41)-F(46) | 91.0(5)  |
| F(43)-P(41)-F(46) | 87.7(5)  |
| F(44)-P(41)-F(46) | 88.6(4)  |
| F(42)-P(41)-F(46) | 89.3(4)  |
| F(45)-P(41)-F(46) | 178.8(4) |
| F(51)-P(51)-F(56) | 95.0(9)  |
| F(51)-P(51)-F(55) | 90.1(7)  |
| F(56)-P(51)-F(55) | 174.6(9) |
| F(51)-P(51)-F(52) | 94.7(9)  |
| F(56)-P(51)-F(52) | 88.0(6)  |
| F(55)-P(51)-F(52) | 93.3(5)  |
| F(51)-P(51)-F(53) | 179.1(7) |
| F(56)-P(51)-F(53) | 85.8(9)  |
| F(55)-P(51)-F(53) | 89.1(7)  |
| F(52)-P(51)-F(53) | 85.7(7)  |
| F(51)-P(51)-F(54) | 88.1(10) |
| F(56)-P(51)-F(54) | 91.7(6)  |
| F(55)-P(51)-F(54) | 86.7(5)  |
| F(52)-P(51)-F(54) | 177.1(9) |
| F(53)-P(51)-F(54) | 91.4(9)  |

---

Symmetry transformations used to generate equivalent atoms:

Table 4. Anisotropic displacement parameters ( $\text{\AA}^2 \times 10^3$ ) for **IL-salen-Cu<sup>II</sup>, 5**. The anisotropic displacement factor exponent takes the form:  $-2h^2 a^* U^{11} + \dots + 2hk a^* b^* U^{12}$  ]

|       | U <sup>11</sup> | U <sup>22</sup> | U <sup>33</sup> | U <sup>23</sup> | U <sup>13</sup> | U <sup>12</sup> |
|-------|-----------------|-----------------|-----------------|-----------------|-----------------|-----------------|
| Cu(1) | 41(1)           | 39(1)           | 29(1)           | 7(1)            | -12(1)          | -8(1)           |
| N(11) | 35(6)           | 55(7)           | 35(5)           | 15(5)           | -26(5)          | -22(5)          |
| N(12) | 31(6)           | 69(9)           | 35(6)           | -2(6)           | 1(4)            | 2(6)            |
| N(13) | 30(6)           | 37(7)           | 70(8)           | -9(6)           | 1(5)            | 1(5)            |
| N(14) | 35(6)           | 54(7)           | 25(5)           | 5(5)            | -16(4)          | -16(5)          |
| N(15) | 26(5)           | 34(6)           | 58(6)           | -7(5)           | 3(5)            | 6(5)            |
| N(16) | 40(7)           | 44(7)           | 61(7)           | -27(6)          | -10(5)          | 19(6)           |
| O(11) | 41(5)           | 50(6)           | 25(4)           | 7(4)            | -7(3)           | 4(4)            |
| O(12) | 47(5)           | 34(5)           | 33(4)           | -1(3)           | -2(4)           | 0(4)            |
| C(11) | 63(10)          | 61(10)          | 38(7)           | 26(7)           | -24(6)          | -15(8)          |
| C(12) | 34(7)           | 68(10)          | 42(7)           | 21(7)           | -13(5)          | -18(8)          |
| C(13) | 46(8)           | 60(10)          | 24(6)           | 3(6)            | -18(5)          | -10(7)          |
| C(14) | 37(7)           | 95(12)          | 22(6)           | -9(7)           | -5(5)           | -15(8)          |
| C(15) | 28(7)           | 74(11)          | 33(7)           | -8(7)           | -9(5)           | -2(7)           |
| C(16) | 43(8)           | 67(10)          | 32(7)           | -6(6)           | -10(6)          | -3(7)           |
| C(17) | 52(8)           | 58(10)          | 30(7)           | 1(6)            | -5(6)           | 0(7)            |
| C(18) | 37(7)           | 58(9)           | 19(6)           | -2(6)           | -15(5)          | -7(6)           |
| C(19) | 40(8)           | 91(12)          | 46(8)           | -30(7)          | -12(6)          | -4(8)           |
| C(20) | 37(8)           | 47(9)           | 70(10)          | -4(8)           | 27(7)           | 10(7)           |
| C(21) | 45(8)           | 49(9)           | 27(6)           | 3(6)            | 4(5)            | -2(7)           |
| C(22) | 36(7)           | 67(10)          | 48(7)           | -9(8)           | 5(5)            | 10(8)           |
| C(23) | 97(14)          | 39(10)          | 164(17)         | -43(11)         | 60(12)          | 0(9)            |
| C(24) | 52(8)           | 37(8)           | 33(6)           | 8(5)            | -15(5)          | -14(6)          |
| C(25) | 39(7)           | 35(8)           | 44(7)           | 6(6)            | -22(6)          | -13(6)          |
| C(26) | 27(6)           | 20(6)           | 40(6)           | 3(5)            | -14(5)          | -6(5)           |
| C(27) | 23(6)           | 41(8)           | 54(8)           | 7(6)            | -26(5)          | -3(6)           |
| C(28) | 32(7)           | 48(9)           | 44(7)           | -4(6)           | -15(5)          | -11(6)          |
| C(29) | 50(7)           | 47(8)           | 21(5)           | 2(5)            | -1(5)           | -13(6)          |
| C(30) | 61(8)           | 23(7)           | 27(6)           | 2(5)            | -16(5)          | 5(6)            |
| C(31) | 30(6)           | 47(8)           | 31(6)           | 2(6)            | -8(5)           | -19(6)          |

Supplementary Material (ESI) for Dalton Transactions  
This journal is (c) The Royal Society of Chemistry 2008

|       |         |         |         |          |          |         |
|-------|---------|---------|---------|----------|----------|---------|
| C(32) | 17(6)   | 53(8)   | 47(7)   | 0(6)     | -2(5)    | 2(6)    |
| C(33) | 46(8)   | 39(8)   | 71(9)   | 0(7)     | -22(7)   | 11(7)   |
| C(34) | 42(8)   | 92(12)  | 48(8)   | -7(8)    | 15(6)    | 2(8)    |
| C(35) | 55(9)   | 98(13)  | 37(7)   | -26(8)   | 16(7)    | -5(9)   |
| C(36) | 66(11)  | 79(12)  | 109(13) | -60(10)  | -30(9)   | 12(9)   |
| P(41) | 39(2)   | 31(2)   | 47(2)   | 2(1)     | -3(1)    | -3(1)   |
| F(41) | 107(8)  | 105(8)  | 114(7)  | 39(6)    | 59(6)    | 48(6)   |
| F(42) | 178(11) | 50(6)   | 117(7)  | 36(5)    | -111(7)  | -42(6)  |
| F(43) | 159(10) | 75(7)   | 129(8)  | 37(6)    | 92(8)    | 39(7)   |
| F(44) | 120(9)  | 42(5)   | 145(9)  | -14(5)   | -81(7)   | -2(5)   |
| F(45) | 59(5)   | 41(5)   | 76(5)   | 7(4)     | -16(4)   | 4(4)    |
| F(46) | 58(5)   | 45(5)   | 88(6)   | 14(4)    | -28(4)   | 2(4)    |
| P(51) | 45(2)   | 46(2)   | 48(2)   | 13(2)    | 17(2)    | 13(2)   |
| F(51) | 95(9)   | 420(30) | 88(8)   | -20(11)  | -38(7)   | 107(13) |
| F(52) | 115(8)  | 40(5)   | 183(10) | 0(6)     | 83(8)    | 4(5)    |
| F(53) | 60(7)   | 340(20) | 142(10) | -155(12) | -4(6)    | -9(9)   |
| F(54) | 177(13) | 57(7)   | 339(19) | 12(9)    | 204(14)  | 17(7)   |
| F(55) | 87(7)   | 93(7)   | 100(6)  | 47(5)    | 56(5)    | 38(5)   |
| F(56) | 207(14) | 139(11) | 238(14) | 120(10)  | 192(12)  | 115(10) |
| O(1S) | 73(8)   | 108(9)  | 94(8)   | 51(7)    | 31(6)    | 23(7)   |
| O(2S) | 400(40) | 150(19) | 240(20) | 22(16)   | -120(20) | -90(20) |

---

Table 5. Hydrogen coordinates ( $\times 10^4$ ) and isotropic displacement parameters ( $\text{\AA}^2 \times 10^3$ )  
for **IL-salen-Cu<sup>II</sup>**, **5**.

|        | x     | y     | z    | U(eq) |
|--------|-------|-------|------|-------|
| H(11A) | 9007  | 7431  | 4683 | 65    |
| H(11B) | 8216  | 7144  | 4273 | 65    |
| H(12)  | 9863  | 5415  | 4205 | 58    |
| H(14)  | 11135 | 3718  | 3993 | 62    |
| H(16)  | 10605 | 409   | 4465 | 57    |
| H(17)  | 8845  | 1196  | 4884 | 56    |
| H(19A) | 13019 | 960   | 4083 | 71    |
| H(19B) | 12840 | 2124  | 3813 | 71    |
| H(20)  | 11571 | -954  | 3885 | 61    |
| H(21)  | 11002 | 1874  | 3175 | 48    |
| H(22)  | 9960  | 23    | 2846 | 60    |
| H(23A) | 10831 | -2705 | 3413 | 149   |
| H(23B) | 10360 | -2312 | 2988 | 149   |
| H(23C) | 9061  | -2305 | 3309 | 149   |
| H(24A) | 6528  | 8151  | 4745 | 49    |
| H(24B) | 5764  | 7051  | 4505 | 49    |
| H(25)  | 5061  | 7831  | 5271 | 48    |
| H(27)  | 3767  | 7858  | 5845 | 48    |
| H(29)  | 3716  | 4925  | 6538 | 47    |
| H(30)  | 5348  | 3875  | 6140 | 45    |
| H(32A) | 1500  | 6728  | 6504 | 47    |
| H(32B) | 2297  | 7995  | 6395 | 47    |
| H(33)  | 4899  | 8506  | 6832 | 63    |
| H(34)  | 1843  | 6051  | 7210 | 73    |
| H(35)  | 3600  | 6696  | 7746 | 76    |
| H(36A) | 5717  | 8319  | 7858 | 128   |
| H(36B) | 6068  | 9221  | 7513 | 128   |
| H(36C) | 6958  | 7939  | 7544 | 128   |



Table 6. Torsion angles [°] for **IL-salen-Cu<sup>II</sup>**, **5**.

---

|                         |            |
|-------------------------|------------|
| O(12)-Cu(1)-N(11)-C(12) | 104(3)     |
| O(11)-Cu(1)-N(11)-C(12) | -3.1(9)    |
| N(14)-Cu(1)-N(11)-C(12) | -174.5(9)  |
| O(12)-Cu(1)-N(11)-C(11) | -72(3)     |
| O(11)-Cu(1)-N(11)-C(11) | -178.9(7)  |
| N(14)-Cu(1)-N(11)-C(11) | 9.6(7)     |
| O(12)-Cu(1)-N(14)-C(25) | 0.6(9)     |
| O(11)-Cu(1)-N(14)-C(25) | 112(2)     |
| N(11)-Cu(1)-N(14)-C(25) | -170.6(9)  |
| O(12)-Cu(1)-N(14)-C(24) | -175.6(7)  |
| O(11)-Cu(1)-N(14)-C(24) | -64(3)     |
| N(11)-Cu(1)-N(14)-C(24) | 13.3(7)    |
| O(12)-Cu(1)-O(11)-C(18) | -172.9(8)  |
| N(14)-Cu(1)-O(11)-C(18) | 76(3)      |
| N(11)-Cu(1)-O(11)-C(18) | -1.4(9)    |
| O(11)-Cu(1)-O(12)-C(31) | -171.4(8)  |
| N(14)-Cu(1)-O(12)-C(31) | 0.5(8)     |
| N(11)-Cu(1)-O(12)-C(31) | 81(3)      |
| C(12)-N(11)-C(11)-C(24) | 154.7(10)  |
| Cu(1)-N(11)-C(11)-C(24) | -29.2(10)  |
| C(11)-N(11)-C(12)-C(13) | 179.3(10)  |
| Cu(1)-N(11)-C(12)-C(13) | 3.7(16)    |
| N(11)-C(12)-C(13)-C(14) | 178.5(10)  |
| N(11)-C(12)-C(13)-C(18) | 0.6(18)    |
| C(18)-C(13)-C(14)-C(15) | -1.0(17)   |
| C(12)-C(13)-C(14)-C(15) | -179.0(10) |
| C(13)-C(14)-C(15)-C(16) | 2.3(17)    |
| C(13)-C(14)-C(15)-C(19) | -174.8(10) |
| C(14)-C(15)-C(16)-C(17) | -0.6(17)   |
| C(19)-C(15)-C(16)-C(17) | 176.5(11)  |
| C(15)-C(16)-C(17)-C(18) | -2.4(18)   |
| Cu(1)-O(11)-C(18)-C(17) | -175.9(8)  |
| Cu(1)-O(11)-C(18)-C(13) | 5.4(14)    |
| C(16)-C(17)-C(18)-O(11) | -175.2(10) |

Supplementary Material (ESI) for Dalton Transactions  
This journal is (c) The Royal Society of Chemistry 2008

|                         |            |
|-------------------------|------------|
| C(16)-C(17)-C(18)-C(13) | 3.6(17)    |
| C(14)-C(13)-C(18)-O(11) | 176.8(10)  |
| C(12)-C(13)-C(18)-O(11) | -5.4(16)   |
| C(14)-C(13)-C(18)-C(17) | -1.9(16)   |
| C(12)-C(13)-C(18)-C(17) | 175.9(10)  |
| C(16)-C(15)-C(19)-N(12) | 74.5(15)   |
| C(14)-C(15)-C(19)-N(12) | -108.6(14) |
| C(20)-N(12)-C(19)-C(15) | -89.5(15)  |
| C(21)-N(12)-C(19)-C(15) | 89.1(15)   |
| C(21)-N(12)-C(20)-N(13) | -0.7(13)   |
| C(19)-N(12)-C(20)-N(13) | 178.1(10)  |
| C(22)-N(13)-C(20)-N(12) | 1.7(14)    |
| C(23)-N(13)-C(20)-N(12) | 175.7(11)  |
| C(20)-N(12)-C(21)-C(22) | -0.5(13)   |
| C(19)-N(12)-C(21)-C(22) | -179.3(10) |
| N(12)-C(21)-C(22)-N(13) | 1.5(12)    |
| C(20)-N(13)-C(22)-C(21) | -2.0(13)   |
| C(23)-N(13)-C(22)-C(21) | -176.3(11) |
| C(25)-N(14)-C(24)-C(11) | 150.3(10)  |
| Cu(1)-N(14)-C(24)-C(11) | -33.3(11)  |
| N(11)-C(11)-C(24)-N(14) | 39.0(12)   |
| C(24)-N(14)-C(25)-C(26) | 175.1(9)   |
| Cu(1)-N(14)-C(25)-C(26) | -0.7(16)   |
| N(14)-C(25)-C(26)-C(31) | -0.2(16)   |
| N(14)-C(25)-C(26)-C(27) | 179.3(10)  |
| C(31)-C(26)-C(27)-C(28) | -1.9(16)   |
| C(25)-C(26)-C(27)-C(28) | 178.5(9)   |
| C(26)-C(27)-C(28)-C(29) | 0.2(15)    |
| C(26)-C(27)-C(28)-C(32) | -177.6(10) |
| C(27)-C(28)-C(29)-C(30) | 1.3(16)    |
| C(32)-C(28)-C(29)-C(30) | 179.2(10)  |
| C(28)-C(29)-C(30)-C(31) | -1.1(17)   |
| Cu(1)-O(12)-C(31)-C(26) | -1.4(14)   |
| Cu(1)-O(12)-C(31)-C(30) | 178.4(7)   |
| C(27)-C(26)-C(31)-O(12) | -178.1(9)  |
| C(25)-C(26)-C(31)-O(12) | 1.4(16)    |

Supplementary Material (ESI) for Dalton Transactions  
This journal is (c) The Royal Society of Chemistry 2008

|                         |            |
|-------------------------|------------|
| C(27)-C(26)-C(31)-C(30) | 2.1(15)    |
| C(25)-C(26)-C(31)-C(30) | -178.4(9)  |
| C(29)-C(30)-C(31)-O(12) | 179.6(9)   |
| C(29)-C(30)-C(31)-C(26) | -0.6(16)   |
| C(27)-C(28)-C(32)-N(15) | -123.3(11) |
| C(29)-C(28)-C(32)-N(15) | 58.9(14)   |
| C(33)-N(15)-C(32)-C(28) | 69.6(15)   |
| C(34)-N(15)-C(32)-C(28) | -106.2(13) |
| C(34)-N(15)-C(33)-N(16) | 0.3(14)    |
| C(32)-N(15)-C(33)-N(16) | -176.1(10) |
| C(35)-N(16)-C(33)-N(15) | -1.0(14)   |
| C(36)-N(16)-C(33)-N(15) | 178.7(11)  |
| C(33)-N(15)-C(34)-C(35) | 0.4(15)    |
| C(32)-N(15)-C(34)-C(35) | 176.8(11)  |
| C(33)-N(16)-C(35)-C(34) | 1.2(15)    |
| C(36)-N(16)-C(35)-C(34) | -178.4(12) |
| N(15)-C(34)-C(35)-N(16) | -1.0(15)   |

---

Symmetry transformations used to generate equivalent atoms:
